# Supplementary material
Source: MDPI journal article supplement (https://www.mdpi.com/2312-7481/5/4/58)
Supplement: s1 [file s1]

Archive with 11 entries (11 files):
- Supplementary Files/1.cif
- Supplementary Files/2.cif
- Supplementary Files/3.cif
- Supplementary Files/4.cif
- Supplementary Files/5.cif
- Supplementary Files/checkcif_1.pdf
- Supplementary Files/checkcif_2.pdf
- Supplementary Files/checkcif_3.pdf
- Supplementary Files/checkcif4new.pdf
- Supplementary Files/checkcif5new.pdf
- Supplementary Files/Supplementary Materials_Kopotkov_et_all_corr.docx
