# Supplementary material
Source: MDPI journal article supplement (https://www.mdpi.com/2312-7481/5/4/58)
Supplement: s1 [file s1 › Supplementary Files/2.cif]

 
data_2
 
_audit_creation_method            SHELXL-97 
_chemical_name_systematic 
; 
 ? 
; 
_chemical_name_common             ? 
_chemical_melting_point           ? 
_chemical_formula_moiety          ? 
_chemical_formula_sum 
 'C28 H36 Co2 N18 O5 Se4' 
_chemical_formula_weight          1138.45 
 
loop_ 
 _atom_type_symbol 
 _atom_type_description 
 _atom_type_scat_dispersion_real 
 _atom_type_scat_dispersion_imag 
 _atom_type_scat_source 
 'C'  'C'   0.0033   0.0016 
 'International Tables Vol C Tables 4.2.6.8 and 6.1.1.4' 
 'H'  'H'   0.0000   0.0000 
 'International Tables Vol C Tables 4.2.6.8 and 6.1.1.4' 
 'N'  'N'   0.0061   0.0033 
 'International Tables Vol C Tables 4.2.6.8 and 6.1.1.4' 
 'O'  'O'   0.0106   0.0060 
 'International Tables Vol C Tables 4.2.6.8 and 6.1.1.4' 
 'Co'  'Co'   0.3494   0.9721 
 'International Tables Vol C Tables 4.2.6.8 and 6.1.1.4' 
 'Se'  'Se'  -0.0929   2.2259 
 'International Tables Vol C Tables 4.2.6.8 and 6.1.1.4' 
 
_symmetry_cell_setting monoclinic
_symmetry_space_group_name_H-M 'P 1 21/c 1'
 
loop_ 
 _symmetry_equiv_pos_as_xyz 
 'x, y, z' 
 '-x, y+1/2, -z+1/2' 
 '-x, -y, -z' 
 'x, -y-1/2, z-1/2' 
 
_cell_length_a                    7.9941(3) 
_cell_length_b                    17.2119(5) 
_cell_length_c                    15.0758(5) 
_cell_angle_alpha                 90.00 
_cell_angle_beta                  103.260(3) 
_cell_angle_gamma                 90.00 
_cell_volume                      2019.04(11) 
_cell_formula_units_Z             2 
_cell_measurement_temperature   150.0(1) 
_cell_measurement_reflns_used   3307
_cell_measurement_theta_min     3.0121
_cell_measurement_theta_max     31.4742
 
_exptl_crystal_description        'prism' 
_exptl_crystal_colour             'dark red' 
_exptl_crystal_size_max           0.3 
_exptl_crystal_size_mid           0.15 
_exptl_crystal_size_min           0.1 
_exptl_crystal_density_meas       ? 
_exptl_crystal_density_diffrn     1.873 
_exptl_crystal_density_method     'not measured' 
_exptl_crystal_F_000              1120 
_exptl_absorpt_coefficient_mu     4.489 
_exptl_absorpt_correction_T_min                   0.61847
_exptl_absorpt_correction_T_max                   1.00000
_exptl_absorpt_correction_type            'multi-scan'
_exptl_absorpt_process_details
;
CrysAlisPro, Agilent Technologies,
Version 1.171.36.20 (release 27-06-2012 CrysAlis171 .NET)
(compiled Jul 11 2012,15:38:31)
Empirical absorption correction using spherical harmonics,
 implemented in SCALE3 ABSPACK scaling algorithm.
;
_diffrn_ambient_temperature 150.01(10) 
_diffrn_radiation_wavelength 0.7107
_diffrn_radiation_type 'Mo K\a'
_diffrn_radiation_source 'Enhance (Mo) X-ray Source'
_diffrn_radiation_monochromator 'graphite'
_diffrn_measurement_device_type 'Xcalibur, Eos'
_diffrn_detector_area_resol_mean 16.2060
_diffrn_measurement_method '\w scans'
_diffrn_standards_number          ? 
_diffrn_standards_interval_count  ? 
_diffrn_standards_interval_time   ? 
_diffrn_standards_decay_%         ? 
_diffrn_reflns_number             10204 
_diffrn_reflns_av_R_equivalents   0.0236 
_diffrn_reflns_av_sigmaI/netI     0.0426 
_diffrn_reflns_limit_h_min        -10 
_diffrn_reflns_limit_h_max        10 
_diffrn_reflns_limit_k_min        -23 
_diffrn_reflns_limit_k_max        12 
_diffrn_reflns_limit_l_min        -20 
_diffrn_reflns_limit_l_max        18 
_diffrn_reflns_theta_min          3.02 
_diffrn_reflns_theta_max          29.07 
_reflns_number_total              5397 
_reflns_number_gt                 4213 
_reflns_threshold_expression      >2sigma(I) 
 
_computing_data_collection        ? 
_computing_cell_refinement        ? 
_computing_data_reduction         ? 
_computing_structure_solution     'SHELXS-97 (Sheldrick, 1990)' 
_computing_structure_refinement   'SHELXL-97 (Sheldrick, 1997)' 
_computing_molecular_graphics     ? 
_computing_publication_material   ? 
 
_refine_special_details 
; 
 Refinement of F^2^ against ALL reflections.  The weighted R-factor wR and 
 goodness of fit S are based on F^2^, conventional R-factors R are based 
 on F, with F set to zero for negative F^2^. The threshold expression of 
 F^2^ > 2sigma(F^2^) is used only for calculating R-factors(gt) etc. and is 
 not relevant to the choice of reflections for refinement.  R-factors based 
 on F^2^ are statistically about twice as large as those based on F, and R- 
 factors based on ALL data will be even larger. 
; 
 
_refine_ls_structure_factor_coef  Fsqd  
_refine_ls_matrix_type            full 
_refine_ls_weighting_scheme       calc  
_refine_ls_weighting_details 
 'calc w=1/[\s^2^(Fo^2^)+(0.0336P)^2^+1.2625P] where P=(Fo^2^+2Fc^2^)/3' 
_atom_sites_solution_primary      direct 
_atom_sites_solution_secondary    difmap 
_atom_sites_solution_hydrogens    geom 
_refine_ls_hydrogen_treatment     mixed 
_refine_ls_extinction_method      none 
_refine_ls_extinction_coef        ? 
_refine_ls_number_reflns          5397 
_refine_ls_number_parameters      272 
_refine_ls_number_restraints      1 
_refine_ls_R_factor_all           0.0538 
_refine_ls_R_factor_gt            0.0354 
_refine_ls_wR_factor_ref          0.0805 
_refine_ls_wR_factor_gt           0.0742 
_refine_ls_goodness_of_fit_ref    1.032 
_refine_ls_restrained_S_all       1.033 
_refine_ls_shift/su_max           0.002 
_refine_ls_shift/su_mean          0.000 
 
loop_ 
 _atom_site_label 
 _atom_site_type_symbol 
 _atom_site_fract_x 
 _atom_site_fract_y 
 _atom_site_fract_z 
 _atom_site_U_iso_or_equiv 
 _atom_site_adp_type 
 _atom_site_occupancy 
 _atom_site_symmetry_multiplicity 
 _atom_site_calc_flag 
 _atom_site_refinement_flags 
 _atom_site_disorder_assembly 
 _atom_site_disorder_group 
Se2 Se 0.13417(4) 0.289660(18) 0.92000(2) 0.02157(8) Uani 1 1 d . . . 
Se1 Se -0.70944(4) -0.134864(17) 0.70605(2) 0.02169(8) Uani 1 1 d . . . 
Co1 Co -0.29154(4) 0.07913(2) 0.81159(2) 0.01144(8) Uani 1 1 d . . . 
O2 O -0.1238(2) -0.00771(12) 0.89946(13) 0.0191(4) Uani 1 1 d . . . 
O1 O -0.4270(2) 0.06065(12) 0.92324(13) 0.0169(4) Uani 1 1 d . . . 
N1 N -0.4441(3) -0.01227(14) 0.74920(17) 0.0201(5) Uani 1 1 d . . . 
N3 N -0.5211(3) 0.15586(13) 0.78946(15) 0.0137(5) Uani 1 1 d . . . 
C13 C -0.0259(4) 0.21327(16) 0.89928(18) 0.0154(6) Uani 1 1 d . . . 
N4 N -0.3116(3) 0.14746(13) 0.68742(15) 0.0127(4) Uani 1 1 d . . . 
N2 N -0.1270(3) 0.16446(15) 0.88592(16) 0.0200(5) Uani 1 1 d . . . 
N6 N -0.6234(3) 0.14840(14) 0.85038(16) 0.0167(5) Uani 1 1 d . . . 
H6A H -0.7158 0.1750 0.8466 0.020 Uiso 1 1 calc R . . 
N5 N -0.0871(3) 0.04496(13) 0.74505(15) 0.0143(5) Uani 1 1 d . . . 
N7 N 0.0190(3) -0.01272(14) 0.78583(16) 0.0187(5) Uani 1 1 d . . . 
H7A H 0.0995 -0.0315 0.7630 0.022 Uiso 1 1 calc R . . 
C12 C -0.5455(4) -0.06085(17) 0.73366(19) 0.0169(6) Uani 1 1 d . . . 
N9 N 0.0859(3) -0.09816(15) 0.90501(17) 0.0245(6) Uani 1 1 d . . . 
H9A H 0.0734 -0.1171 0.9559 0.029 Uiso 1 1 calc R . . 
H9B H 0.1616 -0.1174 0.8789 0.029 Uiso 1 1 calc R . . 
C6 C -0.2054(4) 0.17879(18) 0.5564(2) 0.0211(6) Uani 1 1 d . . . 
H6B H -0.1252 0.1708 0.5213 0.025 Uiso 1 1 calc R . . 
C3 C -0.4389(3) 0.19898(16) 0.66148(18) 0.0140(5) Uani 1 1 d . . . 
C1 C -0.5663(3) 0.09511(16) 0.91782(18) 0.0142(5) Uani 1 1 d . . . 
N8 N -0.6671(3) 0.08410(14) 0.97624(16) 0.0196(5) Uani 1 1 d . . . 
H8A H -0.6370 0.0518 1.0205 0.023 Uiso 1 1 calc R . . 
H8B H -0.7620 0.1093 0.9695 0.023 Uiso 1 1 calc R . . 
C2 C -0.5618(3) 0.20239(16) 0.72145(19) 0.0144(5) Uani 1 1 d . . . 
C8 C -0.0665(3) 0.07674(17) 0.67120(19) 0.0154(5) Uani 1 1 d . . . 
C7 C -0.1961(3) 0.13688(16) 0.63619(18) 0.0148(5) Uani 1 1 d . . . 
C9 C -0.0128(3) -0.03839(17) 0.86628(19) 0.0170(6) Uani 1 1 d . . . 
C4 C -0.4541(4) 0.24363(17) 0.58322(19) 0.0181(6) Uani 1 1 d . . . 
H4A H -0.5416 0.2801 0.5670 0.022 Uiso 1 1 calc R . . 
C5 C -0.3364(4) 0.23269(19) 0.5302(2) 0.0239(7) Uani 1 1 d . . . 
H5A H -0.3449 0.2614 0.4770 0.029 Uiso 1 1 calc R . . 
C10 C -0.7161(4) 0.25336(19) 0.6987(2) 0.0235(7) Uani 1 1 d . . . 
H10A H -0.7179 0.2805 0.6429 0.035 Uiso 1 1 calc R . . 
H10B H -0.7120 0.2903 0.7469 0.035 Uiso 1 1 calc R . . 
H10C H -0.8180 0.2222 0.6917 0.035 Uiso 1 1 calc R . . 
C11 C 0.0725(4) 0.0554(2) 0.6237(2) 0.0254(7) Uani 1 1 d . . . 
H11A H 0.0613 0.0864 0.5697 0.038 Uiso 1 1 calc R . . 
H11B H 0.0626 0.0014 0.6073 0.038 Uiso 1 1 calc R . . 
H11C H 0.1828 0.0648 0.6637 0.038 Uiso 1 1 calc R . . 
O3 O 0.3146(7) 0.0359(4) 0.4354(4) 0.0550(16) Uani 0.50 1 d PD A -1 
H3A H 0.2536 0.0712 0.4466 0.082 Uiso 0.50 1 calc PR A -1 
C14A C 0.433(3) 0.0221(16) 0.5056(17) 0.094(9) Uani 0.50 1 d PD A -1 
H14A H 0.3790 -0.0002 0.5510 0.113 Uiso 0.50 1 calc PR A -1 
H14B H 0.4804 0.0718 0.5292 0.113 Uiso 0.50 1 calc PR A -1 
C14B C 0.5759(13) -0.0272(10) 0.5004(12) 0.029(3) Uani 0.50 1 d P A -1 
H14C H 0.6744 0.0043 0.4990 0.044 Uiso 0.50 1 calc PR A -1 
H14D H 0.5468 -0.0582 0.4461 0.044 Uiso 0.50 1 calc PR A -1 
H14E H 0.6018 -0.0606 0.5528 0.044 Uiso 0.50 1 calc PR A -1 
 
loop_ 
 _atom_site_aniso_label 
 _atom_site_aniso_U_11 
 _atom_site_aniso_U_22 
 _atom_site_aniso_U_33 
 _atom_site_aniso_U_23 
 _atom_site_aniso_U_13 
 _atom_site_aniso_U_12 
Se2 0.01616(15) 0.02042(16) 0.02987(17) -0.00763(13) 0.00889(12) -0.00256(12) 
Se1 0.02054(15) 0.01528(15) 0.02989(17) -0.00451(13) 0.00710(12) -0.00422(12) 
Co1 0.01184(17) 0.01223(18) 0.01107(17) 0.00135(14) 0.00430(13) 0.00013(14) 
O2 0.0165(9) 0.0252(11) 0.0169(10) 0.0058(9) 0.0063(8) 0.0062(9) 
O1 0.0162(10) 0.0190(10) 0.0177(10) 0.0055(8) 0.0083(8) 0.0057(8) 
N1 0.0204(12) 0.0167(12) 0.0231(13) -0.0001(11) 0.0048(10) -0.0005(11) 
N3 0.0147(11) 0.0125(11) 0.0158(11) 0.0011(9) 0.0072(9) 0.0011(9) 
C13 0.0173(13) 0.0173(14) 0.0122(13) -0.0021(11) 0.0043(10) 0.0032(12) 
N4 0.0135(11) 0.0124(11) 0.0123(11) 0.0011(9) 0.0031(8) -0.0005(9) 
N2 0.0223(12) 0.0203(13) 0.0171(12) -0.0030(11) 0.0042(10) -0.0002(11) 
N6 0.0177(11) 0.0179(12) 0.0177(12) 0.0039(10) 0.0108(10) 0.0045(10) 
N5 0.0135(11) 0.0160(12) 0.0135(11) 0.0012(10) 0.0032(9) 0.0022(10) 
N7 0.0171(12) 0.0224(13) 0.0190(12) 0.0065(11) 0.0093(10) 0.0093(10) 
C12 0.0173(13) 0.0168(14) 0.0169(13) -0.0001(12) 0.0045(11) 0.0025(12) 
N9 0.0237(13) 0.0280(15) 0.0238(14) 0.0124(12) 0.0097(11) 0.0119(12) 
C6 0.0193(14) 0.0254(16) 0.0216(15) 0.0061(13) 0.0107(12) 0.0006(13) 
C3 0.0142(13) 0.0141(13) 0.0139(13) 0.0003(11) 0.0038(10) -0.0010(11) 
C1 0.0174(13) 0.0112(13) 0.0148(13) -0.0001(11) 0.0053(11) -0.0020(11) 
N8 0.0226(12) 0.0180(12) 0.0225(13) 0.0082(11) 0.0142(10) 0.0069(11) 
C2 0.0147(13) 0.0127(13) 0.0155(13) -0.0003(11) 0.0029(10) 0.0005(11) 
C8 0.0148(13) 0.0168(14) 0.0162(13) 0.0007(11) 0.0067(10) -0.0003(11) 
C7 0.0146(13) 0.0170(14) 0.0137(13) 0.0019(11) 0.0051(10) 0.0007(11) 
C9 0.0147(13) 0.0187(14) 0.0171(13) 0.0021(12) 0.0027(11) 0.0007(12) 
C4 0.0196(14) 0.0166(14) 0.0185(14) 0.0083(12) 0.0051(11) 0.0021(12) 
C5 0.0260(16) 0.0279(17) 0.0196(15) 0.0137(13) 0.0089(12) 0.0034(14) 
C10 0.0227(15) 0.0241(16) 0.0261(16) 0.0107(14) 0.0103(13) 0.0115(13) 
C11 0.0256(16) 0.0310(17) 0.0251(16) 0.0101(14) 0.0173(13) 0.0098(14) 
O3 0.042(3) 0.071(4) 0.050(4) -0.008(3) 0.005(3) 0.018(3) 
C14A 0.120(17) 0.089(17) 0.055(12) -0.035(12) -0.015(11) 0.042(11) 
C14B 0.008(4) 0.032(7) 0.046(8) -0.015(6) 0.003(4) 0.003(4) 
 
_geom_special_details 
; 
 All esds (except the esd in the dihedral angle between two l.s. planes) 
 are estimated using the full covariance matrix.  The cell esds are taken 
 into account individually in the estimation of esds in distances, angles 
 and torsion angles; correlations between esds in cell parameters are only 
 used when they are defined by crystal symmetry.  An approximate (isotropic) 
 treatment of cell esds is used for estimating esds involving l.s. planes. 
; 
 
loop_ 
 _geom_bond_atom_site_label_1 
 _geom_bond_atom_site_label_2 
 _geom_bond_distance 
 _geom_bond_site_symmetry_2 
 _geom_bond_publ_flag 
Se2 C13 1.811(3) . ? 
Se1 C12 1.807(3) . ? 
Co1 N1 2.079(3) . ? 
Co1 N2 2.114(3) . ? 
Co1 N5 2.185(2) . ? 
Co1 N4 2.185(2) . ? 
Co1 N3 2.223(2) . ? 
Co1 O1 2.2235(18) . ? 
Co1 O2 2.230(2) . ? 
O2 C9 1.233(3) . ? 
O1 C1 1.247(3) . ? 
N1 C12 1.150(4) . ? 
N3 C2 1.283(3) . ? 
N3 N6 1.368(3) . ? 
C13 N2 1.151(4) . ? 
N4 C3 1.339(3) . ? 
N4 C7 1.345(3) . ? 
N6 C1 1.368(3) . ? 
N6 H6A 0.8600 . ? 
N5 C8 1.285(3) . ? 
N5 N7 1.358(3) . ? 
N7 C9 1.368(3) . ? 
N7 H7A 0.8600 . ? 
N9 C9 1.346(4) . ? 
N9 H9A 0.8600 . ? 
N9 H9B 0.8600 . ? 
C6 C5 1.387(4) . ? 
C6 C7 1.390(4) . ? 
C6 H6B 0.9300 . ? 
C3 C4 1.390(4) . ? 
C3 C2 1.481(4) . ? 
C1 N8 1.336(3) . ? 
N8 H8A 0.8600 . ? 
N8 H8B 0.8600 . ? 
C2 C10 1.488(4) . ? 
C8 C7 1.474(4) . ? 
C8 C11 1.499(4) . ? 
C4 C5 1.381(4) . ? 
C4 H4A 0.9300 . ? 
C5 H5A 0.9300 . ? 
C10 H10A 0.9600 . ? 
C10 H10B 0.9600 . ? 
C10 H10C 0.9600 . ? 
C11 H11A 0.9600 . ? 
C11 H11B 0.9600 . ? 
C11 H11C 0.9600 . ? 
O3 C14A 1.27(2) . ? 
O3 H3A 0.8200 . ? 
C14A C14B 1.438(12) . ? 
C14A H14A 0.9700 . ? 
C14A H14B 0.9700 . ? 
C14B H14C 0.9600 . ? 
C14B H14D 0.9600 . ? 
C14B H14E 0.9600 . ? 
 
loop_ 
 _geom_angle_atom_site_label_1 
 _geom_angle_atom_site_label_2 
 _geom_angle_atom_site_label_3 
 _geom_angle 
 _geom_angle_site_symmetry_1 
 _geom_angle_site_symmetry_3 
 _geom_angle_publ_flag 
N1 Co1 N2 174.30(10) . . ? 
N1 Co1 N5 90.66(9) . . ? 
N2 Co1 N5 89.45(9) . . ? 
N1 Co1 N4 95.71(9) . . ? 
N2 Co1 N4 89.70(9) . . ? 
N5 Co1 N4 70.57(8) . . ? 
N1 Co1 N3 90.18(9) . . ? 
N2 Co1 N3 93.37(9) . . ? 
N5 Co1 N3 140.31(8) . . ? 
N4 Co1 N3 69.87(8) . . ? 
N1 Co1 O1 84.09(9) . . ? 
N2 Co1 O1 92.88(9) . . ? 
N5 Co1 O1 148.71(8) . . ? 
N4 Co1 O1 140.58(8) . . ? 
N3 Co1 O1 70.72(7) . . ? 
N1 Co1 O2 88.39(9) . . ? 
N2 Co1 O2 86.25(9) . . ? 
N5 Co1 O2 71.41(8) . . ? 
N4 Co1 O2 141.79(8) . . ? 
N3 Co1 O2 148.27(8) . . ? 
O1 Co1 O2 77.60(7) . . ? 
C9 O2 Co1 115.89(17) . . ? 
C1 O1 Co1 117.70(17) . . ? 
C12 N1 Co1 162.7(2) . . ? 
C2 N3 N6 120.9(2) . . ? 
C2 N3 Co1 122.69(18) . . ? 
N6 N3 Co1 116.31(17) . . ? 
N2 C13 Se2 179.6(3) . . ? 
C3 N4 C7 119.9(2) . . ? 
C3 N4 Co1 120.56(17) . . ? 
C7 N4 Co1 119.58(18) . . ? 
C13 N2 Co1 157.9(2) . . ? 
C1 N6 N3 114.4(2) . . ? 
C1 N6 H6A 122.8 . . ? 
N3 N6 H6A 122.8 . . ? 
C8 N5 N7 120.8(2) . . ? 
C8 N5 Co1 122.80(19) . . ? 
N7 N5 Co1 116.38(16) . . ? 
N5 N7 C9 114.4(2) . . ? 
N5 N7 H7A 122.8 . . ? 
C9 N7 H7A 122.8 . . ? 
N1 C12 Se1 177.9(3) . . ? 
C9 N9 H9A 120.0 . . ? 
C9 N9 H9B 120.0 . . ? 
H9A N9 H9B 120.0 . . ? 
C5 C6 C7 118.7(3) . . ? 
C5 C6 H6B 120.6 . . ? 
C7 C6 H6B 120.6 . . ? 
N4 C3 C4 121.8(2) . . ? 
N4 C3 C2 114.5(2) . . ? 
C4 C3 C2 123.7(3) . . ? 
O1 C1 N8 123.6(3) . . ? 
O1 C1 N6 120.5(2) . . ? 
N8 C1 N6 115.9(2) . . ? 
C1 N8 H8A 120.0 . . ? 
C1 N8 H8B 120.0 . . ? 
H8A N8 H8B 120.0 . . ? 
N3 C2 C3 112.4(2) . . ? 
N3 C2 C10 126.7(2) . . ? 
C3 C2 C10 120.9(2) . . ? 
N5 C8 C7 112.9(2) . . ? 
N5 C8 C11 124.5(3) . . ? 
C7 C8 C11 122.6(2) . . ? 
N4 C7 C6 121.3(3) . . ? 
N4 C7 C8 114.1(2) . . ? 
C6 C7 C8 124.6(2) . . ? 
O2 C9 N9 123.8(3) . . ? 
O2 C9 N7 121.3(3) . . ? 
N9 C9 N7 114.9(2) . . ? 
C5 C4 C3 118.6(3) . . ? 
C5 C4 H4A 120.7 . . ? 
C3 C4 H4A 120.7 . . ? 
C4 C5 C6 119.8(3) . . ? 
C4 C5 H5A 120.1 . . ? 
C6 C5 H5A 120.1 . . ? 
C2 C10 H10A 109.5 . . ? 
C2 C10 H10B 109.5 . . ? 
H10A C10 H10B 109.5 . . ? 
C2 C10 H10C 109.5 . . ? 
H10A C10 H10C 109.5 . . ? 
H10B C10 H10C 109.5 . . ? 
C8 C11 H11A 109.5 . . ? 
C8 C11 H11B 109.5 . . ? 
H11A C11 H11B 109.5 . . ? 
C8 C11 H11C 109.5 . . ? 
H11A C11 H11C 109.5 . . ? 
H11B C11 H11C 109.5 . . ? 
C14A O3 H3A 109.5 . . ? 
O3 C14A C14B 121.0(14) . . ? 
O3 C14A H14A 107.1 . . ? 
C14B C14A H14A 107.1 . . ? 
O3 C14A H14B 107.1 . . ? 
C14B C14A H14B 107.1 . . ? 
H14A C14A H14B 106.8 . . ? 
C14A C14B H14C 109.5 . . ? 
C14A C14B H14D 109.5 . . ? 
H14C C14B H14D 109.5 . . ? 
C14A C14B H14E 109.5 . . ? 
H14C C14B H14E 109.5 . . ? 
H14D C14B H14E 109.5 . . ? 
 
loop_ 
 _geom_torsion_atom_site_label_1 
 _geom_torsion_atom_site_label_2 
 _geom_torsion_atom_site_label_3 
 _geom_torsion_atom_site_label_4 
 _geom_torsion 
 _geom_torsion_site_symmetry_1 
 _geom_torsion_site_symmetry_2 
 _geom_torsion_site_symmetry_3 
 _geom_torsion_site_symmetry_4 
 _geom_torsion_publ_flag 
N1 Co1 O2 C9 84.1(2) . . . . ? 
N2 Co1 O2 C9 -97.9(2) . . . . ? 
N5 Co1 O2 C9 -7.2(2) . . . . ? 
N4 Co1 O2 C9 -13.1(3) . . . . ? 
N3 Co1 O2 C9 171.79(19) . . . . ? 
O1 Co1 O2 C9 168.4(2) . . . . ? 
N1 Co1 O1 C1 -87.1(2) . . . . ? 
N2 Co1 O1 C1 97.7(2) . . . . ? 
N5 Co1 O1 C1 -168.62(19) . . . . ? 
N4 Co1 O1 C1 4.7(3) . . . . ? 
N3 Co1 O1 C1 5.1(2) . . . . ? 
O2 Co1 O1 C1 -176.8(2) . . . . ? 
N2 Co1 N1 C12 62.6(14) . . . . ? 
N5 Co1 N1 C12 153.6(8) . . . . ? 
N4 Co1 N1 C12 -135.8(8) . . . . ? 
N3 Co1 N1 C12 -66.1(8) . . . . ? 
O1 Co1 N1 C12 4.5(8) . . . . ? 
O2 Co1 N1 C12 82.2(8) . . . . ? 
N1 Co1 N3 C2 -96.4(2) . . . . ? 
N2 Co1 N3 C2 88.0(2) . . . . ? 
N5 Co1 N3 C2 -5.2(3) . . . . ? 
N4 Co1 N3 C2 -0.4(2) . . . . ? 
O1 Co1 N3 C2 179.9(2) . . . . ? 
O2 Co1 N3 C2 176.35(19) . . . . ? 
N1 Co1 N3 N6 80.5(2) . . . . ? 
N2 Co1 N3 N6 -95.03(19) . . . . ? 
N5 Co1 N3 N6 171.77(17) . . . . ? 
N4 Co1 N3 N6 176.5(2) . . . . ? 
O1 Co1 N3 N6 -3.16(18) . . . . ? 
O2 Co1 N3 N6 -6.7(3) . . . . ? 
N1 Co1 N4 C3 89.4(2) . . . . ? 
N2 Co1 N4 C3 -92.4(2) . . . . ? 
N5 Co1 N4 C3 178.1(2) . . . . ? 
N3 Co1 N4 C3 1.3(2) . . . . ? 
O1 Co1 N4 C3 1.8(3) . . . . ? 
O2 Co1 N4 C3 -175.95(18) . . . . ? 
N1 Co1 N4 C7 -89.8(2) . . . . ? 
N2 Co1 N4 C7 88.4(2) . . . . ? 
N5 Co1 N4 C7 -1.2(2) . . . . ? 
N3 Co1 N4 C7 -177.9(2) . . . . ? 
O1 Co1 N4 C7 -177.47(18) . . . . ? 
O2 Co1 N4 C7 4.8(3) . . . . ? 
Se2 C13 N2 Co1 -54(47) . . . . ? 
N1 Co1 N2 C13 132.2(9) . . . . ? 
N5 Co1 N2 C13 41.2(6) . . . . ? 
N4 Co1 N2 C13 -29.4(6) . . . . ? 
N3 Co1 N2 C13 -99.2(6) . . . . ? 
O1 Co1 N2 C13 -170.1(6) . . . . ? 
O2 Co1 N2 C13 112.6(6) . . . . ? 
C2 N3 N6 C1 178.2(3) . . . . ? 
Co1 N3 N6 C1 1.2(3) . . . . ? 
N1 Co1 N5 C8 97.0(2) . . . . ? 
N2 Co1 N5 C8 -88.7(2) . . . . ? 
N4 Co1 N5 C8 1.2(2) . . . . ? 
N3 Co1 N5 C8 5.9(3) . . . . ? 
O1 Co1 N5 C8 176.69(19) . . . . ? 
O2 Co1 N5 C8 -174.9(2) . . . . ? 
N1 Co1 N5 N7 -82.78(19) . . . . ? 
N2 Co1 N5 N7 91.53(19) . . . . ? 
N4 Co1 N5 N7 -178.6(2) . . . . ? 
N3 Co1 N5 N7 -173.86(17) . . . . ? 
O1 Co1 N5 N7 -3.1(3) . . . . ? 
O2 Co1 N5 N7 5.30(18) . . . . ? 
C8 N5 N7 C9 176.9(3) . . . . ? 
Co1 N5 N7 C9 -3.3(3) . . . . ? 
Co1 N1 C12 Se1 106(7) . . . . ? 
C7 N4 C3 C4 -1.3(4) . . . . ? 
Co1 N4 C3 C4 179.5(2) . . . . ? 
C7 N4 C3 C2 177.3(2) . . . . ? 
Co1 N4 C3 C2 -1.9(3) . . . . ? 
Co1 O1 C1 N8 174.3(2) . . . . ? 
Co1 O1 C1 N6 -6.6(3) . . . . ? 
N3 N6 C1 O1 3.5(4) . . . . ? 
N3 N6 C1 N8 -177.3(2) . . . . ? 
N6 N3 C2 C3 -177.2(2) . . . . ? 
Co1 N3 C2 C3 -0.4(3) . . . . ? 
N6 N3 C2 C10 0.5(4) . . . . ? 
Co1 N3 C2 C10 177.2(2) . . . . ? 
N4 C3 C2 N3 1.5(4) . . . . ? 
C4 C3 C2 N3 180.0(3) . . . . ? 
N4 C3 C2 C10 -176.3(3) . . . . ? 
C4 C3 C2 C10 2.2(4) . . . . ? 
N7 N5 C8 C7 178.8(2) . . . . ? 
Co1 N5 C8 C7 -1.0(3) . . . . ? 
N7 N5 C8 C11 -0.6(4) . . . . ? 
Co1 N5 C8 C11 179.6(2) . . . . ? 
C3 N4 C7 C6 0.3(4) . . . . ? 
Co1 N4 C7 C6 179.5(2) . . . . ? 
C3 N4 C7 C8 -178.2(2) . . . . ? 
Co1 N4 C7 C8 1.1(3) . . . . ? 
C5 C6 C7 N4 0.4(5) . . . . ? 
C5 C6 C7 C8 178.6(3) . . . . ? 
N5 C8 C7 N4 0.0(4) . . . . ? 
C11 C8 C7 N4 179.3(3) . . . . ? 
N5 C8 C7 C6 -178.4(3) . . . . ? 
C11 C8 C7 C6 1.0(5) . . . . ? 
Co1 O2 C9 N9 -172.0(2) . . . . ? 
Co1 O2 C9 N7 8.4(4) . . . . ? 
N5 N7 C9 O2 -3.5(4) . . . . ? 
N5 N7 C9 N9 176.8(2) . . . . ? 
N4 C3 C4 C5 1.6(4) . . . . ? 
C2 C3 C4 C5 -176.8(3) . . . . ? 
C3 C4 C5 C6 -0.9(5) . . . . ? 
C7 C6 C5 C4 0.0(5) . . . . ? 
 
_diffrn_measured_fraction_theta_max    0.998 
_diffrn_reflns_theta_full              29.07 
_diffrn_measured_fraction_theta_full   0.998 
_refine_diff_density_max    0.719 
_refine_diff_density_min   -0.822 
_refine_diff_density_rms    0.120 
