# Supplementary material
Source: MDPI journal article supplement (https://www.mdpi.com/2312-7481/5/4/58)
Supplement: s1 [file s1 › Supplementary Files/3.cif]

 
data_3
 
_audit_creation_method            SHELXL-97 
_chemical_name_systematic 
; 
 ? 
; 
_chemical_name_common             ? 
_chemical_melting_point           ? 
_chemical_formula_moiety           
'C15 H15 Co N13 O2, 2(H2O)'  
 
_chemical_formula_sum 
 'C15 H19 Co N13 O4' 
_chemical_formula_weight          504.36 
 
loop_ 
 _atom_type_symbol 
 _atom_type_description 
 _atom_type_scat_dispersion_real 
 _atom_type_scat_dispersion_imag 
 _atom_type_scat_source 
 'H'  'H'   0.0000   0.0000 
 'International Tables Vol C Tables 4.2.6.8 and 6.1.1.4' 
 'Co'  'Co'   0.3494   0.9721 
 'International Tables Vol C Tables 4.2.6.8 and 6.1.1.4' 
 'N'  'N'   0.0061   0.0033 
 'International Tables Vol C Tables 4.2.6.8 and 6.1.1.4' 
 'O'  'O'   0.0106   0.0060 
 'International Tables Vol C Tables 4.2.6.8 and 6.1.1.4' 
 'C'  'C'   0.0033   0.0016 
 'International Tables Vol C Tables 4.2.6.8 and 6.1.1.4' 
 
_symmetry_cell_setting triclinic
_symmetry_space_group_name_H-M 'P -1'
 
loop_ 
 _symmetry_equiv_pos_as_xyz 
 'x, y, z' 
 '-x, -y, -z' 
 
_cell_length_a                    8.7403(4) 
_cell_length_b                    11.0815(4) 
_cell_length_c                    11.7571(5) 
_cell_angle_alpha                 76.022(3) 
_cell_angle_beta                  71.082(4) 
_cell_angle_gamma                 76.159(3) 
_cell_volume                      1029.15(7) 
_cell_formula_units_Z             2 
_cell_measurement_temperature   100.0(2) 
_cell_measurement_reflns_used   3559
_cell_measurement_theta_min     2.8709
_cell_measurement_theta_max     29.2700
 
_exptl_crystal_description        'prism' 
_exptl_crystal_colour             'dark red' 
_exptl_crystal_size_max           0.3 
_exptl_crystal_size_mid           0.15 
_exptl_crystal_size_min           0.1 
_exptl_crystal_density_meas       ? 
_exptl_crystal_density_diffrn     1.628 
_exptl_crystal_density_method     'not measured' 
_exptl_crystal_F_000              518 
_exptl_absorpt_coefficient_mu     0.890 
_exptl_absorpt_correction_T_min                   0.99110
_exptl_absorpt_correction_T_max                   1.00000
_exptl_absorpt_correction_type            'multi-scan'
_exptl_absorpt_process_details

;
CrysAlisPro, Agilent Technologies,
Version 1.171.36.20 (release 27-06-2012 CrysAlis171 .NET)
(compiled Jul 11 2012,15:38:31)
Empirical absorption correction using spherical harmonics,
 implemented in SCALE3 ABSPACK scaling algorithm.
;
 
_diffrn_ambient_temperature       100.0(2) 
_diffrn_radiation_wavelength      0.71073 
_diffrn_radiation_type            MoK\a 
_diffrn_radiation_source 'Enhance (Mo) X-ray Source'
_diffrn_radiation_monochromator 'graphite'
_diffrn_measurement_device_type 'Xcalibur, Eos'
_diffrn_detector_area_resol_mean 16.2060
_diffrn_measurement_method        '\w scans' 
_diffrn_standards_number          ? 
_diffrn_standards_interval_count  ? 
_diffrn_standards_interval_time   ? 
_diffrn_standards_decay_%         ? 
_diffrn_reflns_number             7537 
_diffrn_reflns_av_R_equivalents   0.0265 
_diffrn_reflns_av_sigmaI/netI     0.0503 
_diffrn_reflns_limit_h_min        -10 
_diffrn_reflns_limit_h_max        10 
_diffrn_reflns_limit_k_min        -12 
_diffrn_reflns_limit_k_max        13 
_diffrn_reflns_limit_l_min        -14 
_diffrn_reflns_limit_l_max        12 
_diffrn_reflns_theta_min          2.88 
_diffrn_reflns_theta_max          26.32 
_reflns_number_total              4171 
_reflns_number_gt                 3465 
_reflns_threshold_expression      >2sigma(I) 
 
_computing_data_collection        ? 
_computing_cell_refinement        ? 
_computing_data_reduction         ? 
_computing_structure_solution     'SHELXS-97 (Sheldrick, 1990)' 
_computing_structure_refinement   'SHELXL-97 (Sheldrick, 1997)' 
_computing_molecular_graphics     ? 
_computing_publication_material   ? 
 
_refine_special_details 
; 
 Refinement of F^2^ against ALL reflections.  The weighted R-factor wR and 
 goodness of fit S are based on F^2^, conventional R-factors R are based 
 on F, with F set to zero for negative F^2^. The threshold expression of 
 F^2^ > 2sigma(F^2^) is used only for calculating R-factors(gt) etc. and is 
 not relevant to the choice of reflections for refinement.  R-factors based 
 on F^2^ are statistically about twice as large as those based on F, and R- 
 factors based on ALL data will be even larger. 
; 
 
_refine_ls_structure_factor_coef  Fsqd  
_refine_ls_matrix_type            full 
_refine_ls_weighting_scheme       calc  
_refine_ls_weighting_details 
 'calc w=1/[\s^2^(Fo^2^)+(0.0363P)^2^+0.1734P] where P=(Fo^2^+2Fc^2^)/3' 
_atom_sites_solution_primary      direct 
_atom_sites_solution_secondary    difmap 
_atom_sites_solution_hydrogens    geom 
_refine_ls_hydrogen_treatment     mixed 
_refine_ls_extinction_method      none 
_refine_ls_extinction_coef        ? 
_refine_ls_number_reflns          4171 
_refine_ls_number_parameters      314 
_refine_ls_number_restraints      0 
_refine_ls_R_factor_all           0.0477 
_refine_ls_R_factor_gt            0.0361 
_refine_ls_wR_factor_ref          0.0838 
_refine_ls_wR_factor_gt           0.0787 
_refine_ls_goodness_of_fit_ref    1.033 
_refine_ls_restrained_S_all       1.033 
_refine_ls_shift/su_max           0.000 
_refine_ls_shift/su_mean          0.000 
 
loop_ 
 _atom_site_label 
 _atom_site_type_symbol 
 _atom_site_fract_x 
 _atom_site_fract_y 
 _atom_site_fract_z 
 _atom_site_U_iso_or_equiv 
 _atom_site_adp_type 
 _atom_site_occupancy 
 _atom_site_symmetry_multiplicity 
 _atom_site_calc_flag 
 _atom_site_refinement_flags 
 _atom_site_disorder_assembly 
 _atom_site_disorder_group 
Co1 Co 0.09869(4) 0.18601(3) 0.19246(3) 0.01137(10) Uani 1 1 d . . . 
O1 O 0.31168(18) 0.27325(14) 0.14642(14) 0.0150(3) Uani 1 1 d . . . 
O2 O 0.29491(19) 0.06300(14) 0.08472(13) 0.0147(3) Uani 1 1 d . . . 
N1 N 0.0426(2) 0.29829(17) 0.02644(16) 0.0147(4) Uani 1 1 d . . . 
N3 N 0.0220(2) 0.35862(17) 0.27073(16) 0.0125(4) Uani 1 1 d . . . 
N2 N 0.1573(2) 0.08103(17) 0.36126(16) 0.0150(4) Uani 1 1 d . . . 
N4 N -0.1610(2) 0.20515(17) 0.28989(16) 0.0124(4) Uani 1 1 d . . . 
N9 N 0.3837(2) -0.12887(18) 0.02498(17) 0.0187(4) Uani 1 1 d . . . 
H9A H 0.4839 -0.1173 -0.0054 0.022 Uiso 1 1 calc R . . 
H9B H 0.3579 -0.1980 0.0220 0.022 Uiso 1 1 calc R . . 
N7 N 0.1108(2) -0.06503(17) 0.11926(16) 0.0138(4) Uani 1 1 d . . . 
H7A H 0.0841 -0.1307 0.1091 0.017 Uiso 1 1 calc R . . 
N5 N 0.0003(2) 0.02577(17) 0.17993(16) 0.0129(4) Uani 1 1 d . . . 
N6 N 0.1434(2) 0.42585(18) 0.25068(16) 0.0150(4) Uani 1 1 d . . . 
H6A H 0.1273 0.4937 0.2793 0.018 Uiso 1 1 calc R . . 
C11 C -0.2269(3) -0.0886(2) 0.2179(2) 0.0177(5) Uani 1 1 d . . . 
H11A H -0.1699 -0.1185 0.1425 0.027 Uiso 1 1 calc R . . 
H11B H -0.3403 -0.0574 0.2210 0.027 Uiso 1 1 calc R . . 
H11C H -0.2194 -0.1566 0.2852 0.027 Uiso 1 1 calc R . . 
N8 N 0.4159(2) 0.43840(18) 0.15452(17) 0.0167(4) Uani 1 1 d . . . 
H8A H 0.5128 0.4095 0.1124 0.020 Uiso 1 1 calc R . . 
H8B H 0.3979 0.5084 0.1800 0.020 Uiso 1 1 calc R . . 
N11 N -0.2431(2) 0.32425(18) 0.01897(17) 0.0184(4) Uani 1 1 d . . . 
N10 N 0.2564(3) 0.4051(2) -0.13431(18) 0.0251(5) Uani 1 1 d . . . 
C3 C -0.2353(3) 0.3050(2) 0.34564(19) 0.0130(5) Uani 1 1 d . . . 
C14 C 0.1202(3) 0.1365(2) 0.4572(2) 0.0157(5) Uani 1 1 d . . . 
C6 C -0.4170(3) 0.1341(2) 0.3474(2) 0.0172(5) Uani 1 1 d . . . 
H6B H -0.4765 0.0746 0.3478 0.021 Uiso 1 1 calc R . . 
C1 C 0.2940(3) 0.3748(2) 0.18035(19) 0.0125(5) Uani 1 1 d . . . 
C8 C -0.1510(3) 0.0155(2) 0.22574(19) 0.0137(5) Uani 1 1 d . . . 
C10 C -0.1815(3) 0.4978(2) 0.4067(2) 0.0181(5) Uani 1 1 d . . . 
H10A H -0.2557 0.4728 0.4850 0.027 Uiso 1 1 calc R . . 
H10B H -0.2371 0.5687 0.3612 0.027 Uiso 1 1 calc R . . 
H10C H -0.0890 0.5212 0.4178 0.027 Uiso 1 1 calc R . . 
C13 C -0.1088(3) 0.3170(2) 0.01724(19) 0.0143(5) Uani 1 1 d . . . 
C2 C -0.1233(3) 0.3901(2) 0.33824(19) 0.0126(5) Uani 1 1 d . . . 
N13 N 0.3442(3) -0.1247(2) 0.35081(19) 0.0273(5) Uani 1 1 d . . . 
C7 C -0.2493(3) 0.1209(2) 0.29043(19) 0.0135(5) Uani 1 1 d . . . 
C4 C -0.4029(3) 0.3251(2) 0.4029(2) 0.0167(5) Uani 1 1 d . . . 
H4A H -0.4530 0.3953 0.4400 0.020 Uiso 1 1 calc R . . 
C15 C 0.2560(3) -0.0296(2) 0.3611(2) 0.0162(5) Uani 1 1 d . . . 
N12 N 0.0838(3) 0.1937(2) 0.53472(18) 0.0227(5) Uani 1 1 d . . . 
C9 C 0.2693(3) -0.0403(2) 0.07616(19) 0.0134(5) Uani 1 1 d . . . 
C12 C 0.1531(3) 0.3579(2) -0.0622(2) 0.0163(5) Uani 1 1 d . . . 
C5 C -0.4939(3) 0.2380(2) 0.4036(2) 0.0187(5) Uani 1 1 d . . . 
H5A H -0.6063 0.2493 0.4418 0.022 Uiso 1 1 calc R . . 
O1W O 0.1172(2) 0.68129(16) 0.27413(16) 0.0205(4) Uani 1 1 d . . . 
O2W O 0.4328(2) 0.62933(18) 0.30442(17) 0.0238(4) Uani 1 1 d . . . 
H7 H 0.419(4) 0.703(3) 0.322(3) 0.055(11) Uiso 1 1 d . . . 
H10 H 0.207(4) 0.674(3) 0.280(2) 0.027(8) Uiso 1 1 d . . . 
H15 H 0.056(4) 0.710(3) 0.341(3) 0.033(8) Uiso 1 1 d . . . 
H18 H 0.527(4) 0.624(3) 0.256(3) 0.044(10) Uiso 1 1 d . . . 
 
loop_ 
 _atom_site_aniso_label 
 _atom_site_aniso_U_11 
 _atom_site_aniso_U_22 
 _atom_site_aniso_U_33 
 _atom_site_aniso_U_23 
 _atom_site_aniso_U_13 
 _atom_site_aniso_U_12 
Co1 0.00828(16) 0.01130(17) 0.01364(17) -0.00523(12) -0.00095(12) -0.00001(12) 
O1 0.0112(8) 0.0145(8) 0.0199(8) -0.0091(7) -0.0012(6) -0.0016(7) 
O2 0.0121(8) 0.0131(8) 0.0181(8) -0.0071(7) -0.0003(6) -0.0018(7) 
N1 0.0105(10) 0.0155(10) 0.0152(10) -0.0017(8) -0.0018(8) -0.0010(8) 
N3 0.0105(10) 0.0128(10) 0.0132(9) -0.0033(7) -0.0015(8) -0.0018(8) 
N2 0.0153(10) 0.0127(10) 0.0155(10) -0.0044(8) -0.0049(8) 0.0028(8) 
N4 0.0118(10) 0.0127(10) 0.0120(9) -0.0032(7) -0.0025(7) -0.0011(8) 
N9 0.0115(10) 0.0158(11) 0.0275(11) -0.0120(9) 0.0030(8) -0.0036(9) 
N7 0.0098(10) 0.0123(10) 0.0190(10) -0.0096(8) 0.0002(8) -0.0002(8) 
N5 0.0130(10) 0.0122(10) 0.0118(9) -0.0050(7) -0.0009(7) 0.0002(8) 
N6 0.0103(10) 0.0135(10) 0.0207(10) -0.0098(8) 0.0019(8) -0.0030(8) 
C11 0.0146(12) 0.0188(13) 0.0202(12) -0.0052(10) -0.0026(10) -0.0053(10) 
N8 0.0109(10) 0.0144(10) 0.0232(10) -0.0096(8) 0.0013(8) -0.0018(8) 
N11 0.0160(11) 0.0178(11) 0.0216(11) -0.0066(8) -0.0051(8) -0.0004(9) 
N10 0.0196(12) 0.0301(13) 0.0220(11) -0.0010(9) -0.0016(9) -0.0074(10) 
C3 0.0135(12) 0.0131(12) 0.0114(11) -0.0026(9) -0.0040(9) 0.0008(9) 
C14 0.0090(11) 0.0175(12) 0.0171(12) -0.0004(10) -0.0021(9) -0.0011(10) 
C6 0.0126(12) 0.0198(13) 0.0194(12) -0.0052(10) -0.0031(9) -0.0039(10) 
C1 0.0107(11) 0.0137(12) 0.0119(11) -0.0025(9) -0.0030(9) 0.0000(9) 
C8 0.0140(12) 0.0149(12) 0.0116(11) -0.0022(9) -0.0028(9) -0.0025(10) 
C10 0.0130(12) 0.0180(13) 0.0209(12) -0.0096(10) 0.0012(9) -0.0009(10) 
C13 0.0174(13) 0.0109(11) 0.0135(11) -0.0032(9) -0.0025(9) -0.0018(10) 
C2 0.0133(12) 0.0115(11) 0.0113(11) -0.0034(9) -0.0028(9) 0.0011(9) 
N13 0.0311(13) 0.0220(12) 0.0280(12) -0.0094(10) -0.0114(10) 0.0060(11) 
C7 0.0124(12) 0.0161(12) 0.0120(11) -0.0028(9) -0.0042(9) -0.0010(10) 
C4 0.0139(12) 0.0183(13) 0.0152(11) -0.0061(9) -0.0004(9) 0.0001(10) 
C15 0.0180(13) 0.0171(13) 0.0144(11) -0.0033(9) -0.0051(9) -0.0034(11) 
N12 0.0217(12) 0.0262(12) 0.0193(11) -0.0094(9) -0.0054(9) 0.0023(10) 
C9 0.0104(11) 0.0150(12) 0.0142(11) -0.0059(9) -0.0016(9) -0.0005(10) 
C12 0.0153(12) 0.0152(12) 0.0197(12) -0.0070(10) -0.0075(10) 0.0024(10) 
C5 0.0096(12) 0.0241(14) 0.0198(12) -0.0066(10) 0.0004(9) -0.0016(10) 
O1W 0.0181(10) 0.0194(10) 0.0224(10) -0.0105(7) 0.0011(8) -0.0026(8) 
O2W 0.0187(10) 0.0193(10) 0.0302(10) -0.0093(8) 0.0018(8) -0.0043(8) 
 
_geom_special_details 
; 
 All esds (except the esd in the dihedral angle between two l.s. planes) 
 are estimated using the full covariance matrix.  The cell esds are taken 
 into account individually in the estimation of esds in distances, angles 
 and torsion angles; correlations between esds in cell parameters are only 
 used when they are defined by crystal symmetry.  An approximate (isotropic) 
 treatment of cell esds is used for estimating esds involving l.s. planes. 
; 
 
loop_ 
 _geom_bond_atom_site_label_1 
 _geom_bond_atom_site_label_2 
 _geom_bond_distance 
 _geom_bond_site_symmetry_2 
 _geom_bond_publ_flag 
Co1 O1 2.1559(14) . ? 
Co1 N4 2.1702(18) . ? 
Co1 O2 2.1705(15) . ? 
Co1 N1 2.1805(18) . ? 
Co1 N3 2.1889(18) . ? 
Co1 N2 2.1938(19) . ? 
Co1 N5 2.2032(17) . ? 
O1 C1 1.242(3) . ? 
O2 C9 1.251(2) . ? 
N1 C13 1.325(3) . ? 
N1 C12 1.333(3) . ? 
N3 C2 1.278(3) . ? 
N3 N6 1.367(2) . ? 
N2 C15 1.320(3) . ? 
N2 C14 1.325(3) . ? 
N4 C7 1.344(3) . ? 
N4 C3 1.344(3) . ? 
N9 C9 1.323(3) . ? 
N7 N5 1.375(2) . ? 
N7 C9 1.382(3) . ? 
N5 C8 1.277(3) . ? 
N6 C1 1.379(3) . ? 
C11 C8 1.496(3) . ? 
N8 C1 1.331(3) . ? 
N11 C13 1.152(3) . ? 
N10 C12 1.150(3) . ? 
C3 C4 1.388(3) . ? 
C3 C2 1.485(3) . ? 
C14 N12 1.153(3) . ? 
C6 C7 1.388(3) . ? 
C6 C5 1.388(3) . ? 
C8 C7 1.485(3) . ? 
C10 C2 1.496(3) . ? 
N13 C15 1.154(3) . ? 
C4 C5 1.386(3) . ? 
 
loop_ 
 _geom_angle_atom_site_label_1 
 _geom_angle_atom_site_label_2 
 _geom_angle_atom_site_label_3 
 _geom_angle 
 _geom_angle_site_symmetry_1 
 _geom_angle_site_symmetry_3 
 _geom_angle_publ_flag 
O1 Co1 N4 143.09(6) . . ? 
O1 Co1 O2 75.56(6) . . ? 
N4 Co1 O2 141.34(6) . . ? 
O1 Co1 N1 89.07(6) . . ? 
N4 Co1 N1 90.73(7) . . ? 
O2 Co1 N1 90.19(6) . . ? 
O1 Co1 N3 72.27(6) . . ? 
N4 Co1 N3 70.83(6) . . ? 
O2 Co1 N3 147.81(6) . . ? 
N1 Co1 N3 88.30(7) . . ? 
O1 Co1 N2 89.05(6) . . ? 
N4 Co1 N2 89.62(7) . . ? 
O2 Co1 N2 91.19(6) . . ? 
N1 Co1 N2 177.32(7) . . ? 
N3 Co1 N2 89.31(7) . . ? 
O1 Co1 N5 146.66(7) . . ? 
N4 Co1 N5 70.23(7) . . ? 
O2 Co1 N5 71.12(6) . . ? 
N1 Co1 N5 92.23(7) . . ? 
N3 Co1 N5 141.06(7) . . ? 
N2 Co1 N5 90.39(7) . . ? 
C1 O1 Co1 118.15(14) . . ? 
C9 O2 Co1 119.27(14) . . ? 
C13 N1 C12 118.62(19) . . ? 
C13 N1 Co1 119.54(14) . . ? 
C12 N1 Co1 121.59(15) . . ? 
C2 N3 N6 121.74(18) . . ? 
C2 N3 Co1 122.59(14) . . ? 
N6 N3 Co1 115.48(13) . . ? 
C15 N2 C14 118.42(19) . . ? 
C15 N2 Co1 119.85(15) . . ? 
C14 N2 Co1 120.57(15) . . ? 
C7 N4 C3 119.82(19) . . ? 
C7 N4 Co1 120.47(15) . . ? 
C3 N4 Co1 119.65(14) . . ? 
N5 N7 C9 113.30(16) . . ? 
C8 N5 N7 120.56(18) . . ? 
C8 N5 Co1 122.94(15) . . ? 
N7 N5 Co1 116.51(13) . . ? 
N3 N6 C1 113.77(17) . . ? 
N4 C3 C4 121.70(19) . . ? 
N4 C3 C2 114.14(19) . . ? 
C4 C3 C2 124.2(2) . . ? 
N12 C14 N2 174.4(3) . . ? 
C7 C6 C5 118.5(2) . . ? 
O1 C1 N8 123.3(2) . . ? 
O1 C1 N6 120.24(19) . . ? 
N8 C1 N6 116.49(19) . . ? 
N5 C8 C7 112.39(18) . . ? 
N5 C8 C11 125.8(2) . . ? 
C7 C8 C11 121.80(19) . . ? 
N11 C13 N1 173.4(2) . . ? 
N3 C2 C3 112.50(19) . . ? 
N3 C2 C10 126.28(19) . . ? 
C3 C2 C10 121.21(19) . . ? 
N4 C7 C6 121.6(2) . . ? 
N4 C7 C8 113.88(19) . . ? 
C6 C7 C8 124.51(19) . . ? 
C5 C4 C3 118.5(2) . . ? 
N13 C15 N2 174.4(3) . . ? 
O2 C9 N9 124.6(2) . . ? 
O2 C9 N7 119.1(2) . . ? 
N9 C9 N7 116.22(18) . . ? 
N10 C12 N1 175.2(3) . . ? 
C4 C5 C6 119.9(2) . . ? 
 
_diffrn_measured_fraction_theta_max    0.998 
_diffrn_reflns_theta_full              26.32 
_diffrn_measured_fraction_theta_full   0.998 
_refine_diff_density_max    0.478 
_refine_diff_density_min   -0.552 
_refine_diff_density_rms    0.074 
