# Supplementary material
Source: MDPI journal article supplement (https://www.mdpi.com/2312-7481/5/4/58)
Supplement: s1 [file s1 › Supplementary Files/4.cif]

 
data_4 
 
_audit_creation_method            SHELXL-97 
_chemical_name_systematic 
; 
 ? 
; 
_chemical_name_common             ? 
_chemical_melting_point           ? 
_chemical_formula_moiety          
'(C15 H17 Co N1 O3)+, (N1 O3)-, (H2 O), 0.161(O)'  
_chemical_formula_sum 
 'C15 H19 Co N11 O7.16' 
_chemical_formula_weight          526.92 
 
loop_ 
 _atom_type_symbol 
 _atom_type_description 
 _atom_type_scat_dispersion_real 
 _atom_type_scat_dispersion_imag 
 _atom_type_scat_source 
 'C'  'C'   0.0033   0.0016 
 'International Tables Vol C Tables 4.2.6.8 and 6.1.1.4' 
 'H'  'H'   0.0000   0.0000 
 'International Tables Vol C Tables 4.2.6.8 and 6.1.1.4' 
 'N'  'N'   0.0061   0.0033 
 'International Tables Vol C Tables 4.2.6.8 and 6.1.1.4' 
 'O'  'O'   0.0106   0.0060 
 'International Tables Vol C Tables 4.2.6.8 and 6.1.1.4' 
 'Co'  'Co'   0.3494   0.9721 
 'International Tables Vol C Tables 4.2.6.8 and 6.1.1.4' 
 
_symmetry_cell_setting monoclinic
_symmetry_space_group_name_H-M 'P 1 21/c 1'
 
loop_ 
 _symmetry_equiv_pos_as_xyz 
 'x, y, z' 
 '-x, y+1/2, -z+1/2' 
 '-x, -y, -z' 
 'x, -y-1/2, z-1/2' 
 
_cell_length_a                    11.8562(4) 
_cell_length_b                    15.6902(7) 
_cell_length_c                    11.9620(3) 
_cell_angle_alpha                 90.00 
_cell_angle_beta                  94.515(3) 
_cell_angle_gamma                 90.00 
_cell_volume                      2218.34(14) 
_cell_formula_units_Z             4 
_cell_measurement_temperature   150.0(1) 
_cell_measurement_reflns_used   4649
_cell_measurement_theta_min     2.8292
_cell_measurement_theta_max     31.3965

 
_exptl_crystal_description        'prism' 
_exptl_crystal_colour             'dark red' 
_exptl_crystal_size_max           0.4 
_exptl_crystal_size_mid           0.3 
_exptl_crystal_size_min           0.2 
_exptl_crystal_density_meas       ? 
_exptl_crystal_density_diffrn     1.578 
_exptl_crystal_density_method     'not measured' 
_exptl_crystal_F_000              1081
_exptl_absorpt_coefficient_mu     0.837 
_exptl_absorpt_correction_T_min                   0.93528
_exptl_absorpt_correction_T_max                   1.00000
_exptl_absorpt_correction_type            'multi-scan'
_exptl_absorpt_process_details
;
CrysAlisPro, Agilent Technologies,
Version 1.171.36.20 (release 27-06-2012 CrysAlis171 .NET)
(compiled Jul 11 2012,15:38:31)
Empirical absorption correction using spherical harmonics,
 implemented in SCALE3 ABSPACK scaling algorithm.
;
_diffrn_ambient_temperature 150.0(1) 
_diffrn_radiation_wavelength 0.7107
_diffrn_radiation_type 'Mo K\a'
_diffrn_radiation_source 'Enhance (Mo) X-ray Source'
_diffrn_radiation_monochromator 'graphite'
_diffrn_measurement_device_type 'Xcalibur, Eos'
_diffrn_detector_area_resol_mean 16.2060
_diffrn_measurement_method '\w scans'
_diffrn_standards_number          ? 
_diffrn_standards_interval_count  ? 
_diffrn_standards_interval_time   ? 
_diffrn_standards_decay_%         ? 
_diffrn_reflns_number             11149 
_diffrn_reflns_av_R_equivalents   0.0282 
_diffrn_reflns_av_sigmaI/netI     0.0458 
_diffrn_reflns_limit_h_min        -16 
_diffrn_reflns_limit_h_max        16 
_diffrn_reflns_limit_k_min        -13 
_diffrn_reflns_limit_k_max        21 
_diffrn_reflns_limit_l_min        -15 
_diffrn_reflns_limit_l_max        16 
_diffrn_reflns_theta_min          2.83 
_diffrn_reflns_theta_max          29.07 
_reflns_number_total              5929 
_reflns_number_gt                 4738 
_reflns_threshold_expression      >2sigma(I) 
 
_computing_data_collection        ? 
_computing_cell_refinement        ? 
_computing_data_reduction         ? 
_computing_structure_solution     'SHELXS-97 (Sheldrick, 1990)' 
_computing_structure_refinement   'SHELXL-97 (Sheldrick, 1997)' 
_computing_molecular_graphics     ? 
_computing_publication_material   ? 
 
_refine_special_details 
; 
 Refinement of F^2^ against ALL reflections.  The weighted R-factor wR and 
 goodness of fit S are based on F^2^, conventional R-factors R are based 
 on F, with F set to zero for negative F^2^. The threshold expression of 
 F^2^ > 2sigma(F^2^) is used only for calculating R-factors(gt) etc. and is 
 not relevant to the choice of reflections for refinement.  R-factors based 
 on F^2^ are statistically about twice as large as those based on F, and R- 
 factors based on ALL data will be even larger. 
; 
 
_refine_ls_structure_factor_coef  Fsqd  
_refine_ls_matrix_type            full 
_refine_ls_weighting_scheme       calc  
_refine_ls_weighting_details 
 'calc w=1/[\s^2^(Fo^2^)+(0.0687P)^2^+2.3498P] where P=(Fo^2^+2Fc^2^)/3' 
_atom_sites_solution_primary      direct 
_atom_sites_solution_secondary    difmap 
_atom_sites_solution_hydrogens    geom 
_refine_ls_hydrogen_treatment     mixed 
_refine_ls_extinction_method      none 
_refine_ls_extinction_coef        ? 
_refine_ls_number_reflns          5929 
_refine_ls_number_parameters      329 
_refine_ls_number_restraints      15 
_refine_ls_R_factor_all           0.0693 
_refine_ls_R_factor_gt            0.0534 
_refine_ls_wR_factor_ref          0.1464 
_refine_ls_wR_factor_gt           0.1334 
_refine_ls_goodness_of_fit_ref    1.042 
_refine_ls_restrained_S_all       1.066 
_refine_ls_shift/su_max           0.050 
_refine_ls_shift/su_mean          0.001 
 
loop_ 
 _atom_site_label 
 _atom_site_type_symbol 
 _atom_site_fract_x 
 _atom_site_fract_y 
 _atom_site_fract_z 
 _atom_site_U_iso_or_equiv 
 _atom_site_adp_type 
 _atom_site_occupancy 
 _atom_site_symmetry_multiplicity 
 _atom_site_calc_flag 
 _atom_site_refinement_flags 
 _atom_site_disorder_assembly 
 _atom_site_disorder_group 
Co1 Co -0.30362(3) 0.53808(2) 0.26512(3) 0.02104(12) Uani 1 1 d . . . 
O2 O -0.37961(15) 0.50125(12) 0.10042(14) 0.0223(4) Uani 1 1 d . . . 
O1 O -0.40094(17) 0.65071(13) 0.20806(15) 0.0281(4) Uani 1 1 d . . . 
N3 N -0.2785(2) 0.63764(17) 0.39440(19) 0.0281(5) Uani 1 1 d . . . 
N9 N -0.42320(19) 0.39220(15) -0.02110(19) 0.0264(5) Uani 1 1 d . . . 
H9A H -0.4655 0.4240 -0.0655 0.032 Uiso 1 1 calc R . . 
H9B H -0.4145 0.3392 -0.0368 0.032 Uiso 1 1 calc R . . 
N7 N -0.30430(19) 0.36990(15) 0.13646(18) 0.0250(5) Uani 1 1 d . . . 
H7A H -0.2906 0.3185 0.1165 0.030 Uiso 1 1 calc R . . 
N4 N -0.20158(19) 0.48773(16) 0.41143(18) 0.0256(5) Uani 1 1 d . . . 
N6 N -0.3250(2) 0.71420(16) 0.3677(2) 0.0309(5) Uani 1 1 d . . . 
H6A H -0.3153 0.7581 0.4105 0.037 Uiso 1 1 calc R . . 
N8 N -0.4346(2) 0.79191(16) 0.2383(2) 0.0333(6) Uani 1 1 d . . . 
H8A H -0.4750 0.7977 0.1759 0.040 Uiso 1 1 calc R . . 
H8B H -0.4234 0.8349 0.2825 0.040 Uiso 1 1 calc R . . 
N5 N -0.26101(18) 0.40416(15) 0.23598(18) 0.0232(4) Uani 1 1 d . . . 
N1 N -0.16329(19) 0.58146(16) 0.18397(18) 0.0271(5) Uani 1 1 d . . . 
N11 N 0.1853(3) 0.5354(2) 0.1186(3) 0.0488(8) Uani 1 1 d . . . 
C13 C -0.0937(2) 0.59180(18) 0.1240(2) 0.0244(5) Uani 1 1 d . . . 
C8 C -0.2024(2) 0.35830(19) 0.3082(2) 0.0263(5) Uani 1 1 d . . . 
C15 C -0.0242(3) 0.6426(2) -0.0520(3) 0.0420(8) Uani 1 1 d . . . 
C12 C -0.0049(2) 0.60405(19) 0.0546(2) 0.0294(6) Uani 1 1 d . . . 
C3 C -0.1775(2) 0.5378(2) 0.5017(2) 0.0293(6) Uani 1 1 d . . . 
C14 C 0.1002(3) 0.5669(2) 0.0877(3) 0.0328(6) Uani 1 1 d . . . 
C2 C -0.2202(2) 0.6259(2) 0.4885(2) 0.0289(6) Uani 1 1 d . . . 
C10 C -0.1960(3) 0.6922(2) 0.5770(3) 0.0412(8) Uani 1 1 d . . . 
H10A H -0.2566 0.7329 0.5737 0.062 Uiso 1 1 calc R . . 
H10B H -0.1264 0.7207 0.5646 0.062 Uiso 1 1 calc R . . 
H10C H -0.1895 0.6656 0.6495 0.062 Uiso 1 1 calc R . . 
C7 C -0.1683(2) 0.4065(2) 0.4124(2) 0.0277(6) Uani 1 1 d . . . 
C11 C -0.1720(3) 0.2676(2) 0.2947(3) 0.0340(6) Uani 1 1 d . . . 
H11A H -0.1612 0.2564 0.2174 0.051 Uiso 1 1 calc R . . 
H11B H -0.2318 0.2322 0.3181 0.051 Uiso 1 1 calc R . . 
H11C H -0.1034 0.2554 0.3398 0.051 Uiso 1 1 calc R . . 
C1 C -0.3894(2) 0.71667(19) 0.2666(2) 0.0271(6) Uani 1 1 d . . . 
C6 C -0.1079(3) 0.3709(2) 0.5064(2) 0.0355(7) Uani 1 1 d . . . 
H6B H -0.0853 0.3141 0.5067 0.043 Uiso 1 1 calc R . . 
N10 N -0.0392(3) 0.6748(3) -0.1377(3) 0.0701(12) Uani 1 1 d . . . 
C4 C -0.1178(3) 0.5062(2) 0.5982(2) 0.0357(7) Uani 1 1 d . . . 
H4A H -0.1019 0.5408 0.6606 0.043 Uiso 1 1 calc R . . 
C9 C -0.3715(2) 0.42484(17) 0.0714(2) 0.0206(5) Uani 1 1 d . . . 
C5 C -0.0829(3) 0.4225(3) 0.5985(3) 0.0419(8) Uani 1 1 d . . . 
H5A H -0.0421 0.4005 0.6615 0.050 Uiso 1 1 calc R . . 
N2 N -0.3992(2) 0.16544(17) 0.0346(2) 0.0349(6) Uani 1 1 d . . . 
O4 O -0.3721(3) 0.19447(17) 0.1298(2) 0.0527(7) Uani 1 1 d . . . 
O5 O -0.3865(2) 0.20974(15) -0.0495(2) 0.0415(5) Uani 1 1 d . . . 
O6 O -0.4370(3) 0.0931(2) 0.0243(3) 0.0806(11) Uani 1 1 d U . . 
O1W O 0.3191(2) 0.38602(16) 0.0729(2) 0.0420(6) Uani 1 1 d D . . 
H4 H 0.271(3) 0.427(2) 0.095(3) 0.050 Uiso 1 1 d D . . 
H3 H 0.341(3) 0.393(2) 0.003(2) 0.050 Uiso 1 1 d D . . 
O2W O -0.6521(16) 0.5340(12) 0.2804(16) 0.059(7) Uani 0.161(10) 1 d PU . . 
O3 O -0.45745(19) 0.49004(18) 0.32222(19) 0.0345(5) Uani 1 1 d . . . 
H1 H -0.495(4) 0.527(3) 0.335(3) 0.041 Uiso 1 1 d . . . 
H2 H -0.445(3) 0.461(3) 0.377(4) 0.041 Uiso 1 1 d . . . 
 
loop_ 
 _atom_site_aniso_label 
 _atom_site_aniso_U_11 
 _atom_site_aniso_U_22 
 _atom_site_aniso_U_33 
 _atom_site_aniso_U_23 
 _atom_site_aniso_U_13 
 _atom_site_aniso_U_12 
Co1 0.02125(18) 0.0252(2) 0.01597(17) 0.00005(13) -0.00279(12) -0.00148(14) 
O2 0.0260(9) 0.0212(9) 0.0188(8) -0.0017(7) -0.0038(7) 0.0014(8) 
O1 0.0327(10) 0.0271(10) 0.0230(9) -0.0063(8) -0.0065(7) 0.0012(8) 
N3 0.0282(11) 0.0341(13) 0.0216(10) -0.0028(9) -0.0009(9) -0.0062(10) 
N9 0.0269(11) 0.0248(11) 0.0260(11) -0.0056(9) -0.0077(9) 0.0043(9) 
N7 0.0283(11) 0.0218(11) 0.0240(10) -0.0004(9) -0.0045(8) 0.0024(9) 
N4 0.0227(10) 0.0335(12) 0.0198(10) 0.0044(9) -0.0031(8) -0.0039(10) 
N6 0.0365(13) 0.0299(13) 0.0253(11) -0.0082(10) -0.0047(10) -0.0009(11) 
N8 0.0389(14) 0.0265(12) 0.0334(12) -0.0087(10) -0.0046(10) 0.0021(11) 
N5 0.0198(10) 0.0272(11) 0.0217(10) 0.0028(9) -0.0043(8) -0.0007(9) 
N1 0.0242(11) 0.0344(13) 0.0218(10) 0.0039(9) -0.0032(9) -0.0027(10) 
N11 0.0331(15) 0.056(2) 0.0588(19) -0.0081(15) 0.0099(13) -0.0002(14) 
C13 0.0254(12) 0.0236(13) 0.0229(12) -0.0034(10) -0.0054(10) -0.0048(11) 
C8 0.0214(12) 0.0301(14) 0.0269(13) 0.0083(11) -0.0003(10) -0.0006(11) 
C15 0.0398(17) 0.049(2) 0.0379(17) 0.0039(15) 0.0087(14) -0.0115(16) 
C12 0.0295(13) 0.0312(15) 0.0279(13) -0.0041(12) 0.0047(11) -0.0085(12) 
C3 0.0243(12) 0.0449(17) 0.0179(11) 0.0024(11) -0.0028(9) -0.0093(12) 
C14 0.0319(15) 0.0343(15) 0.0331(14) -0.0103(13) 0.0090(12) -0.0078(13) 
C2 0.0272(13) 0.0403(16) 0.0189(11) -0.0051(11) 0.0007(10) -0.0076(12) 
C10 0.0441(17) 0.051(2) 0.0268(14) -0.0166(14) -0.0057(13) -0.0060(16) 
C7 0.0208(12) 0.0398(16) 0.0218(12) 0.0089(11) -0.0023(9) -0.0053(12) 
C11 0.0316(14) 0.0327(15) 0.0367(15) 0.0075(13) -0.0035(12) 0.0049(13) 
C1 0.0256(12) 0.0326(14) 0.0228(12) -0.0075(11) 0.0011(10) -0.0039(11) 
C6 0.0292(14) 0.0437(18) 0.0324(15) 0.0148(13) -0.0049(12) -0.0005(13) 
N10 0.059(2) 0.101(3) 0.051(2) 0.035(2) 0.0075(16) -0.014(2) 
C4 0.0340(15) 0.0513(19) 0.0208(12) 0.0058(13) -0.0050(11) -0.0085(15) 
C9 0.0183(11) 0.0243(12) 0.0190(11) 0.0009(9) -0.0004(9) -0.0017(10) 
C5 0.0372(16) 0.062(2) 0.0241(13) 0.0132(15) -0.0108(12) -0.0051(16) 
N2 0.0362(13) 0.0297(13) 0.0403(14) -0.0102(11) 0.0120(11) -0.0043(11) 
O4 0.0730(18) 0.0412(14) 0.0421(13) -0.0082(11) -0.0069(12) -0.0043(14) 
O5 0.0445(13) 0.0328(12) 0.0480(13) -0.0042(10) 0.0092(11) 0.0032(11) 
O6 0.121(3) 0.0618(18) 0.0650(18) -0.0283(15) 0.0439(18) -0.0527(19) 
O1W 0.0456(13) 0.0374(13) 0.0439(13) 0.0178(11) 0.0087(11) 0.0069(11) 
O2W 0.052(8) 0.063(8) 0.060(8) -0.003(5) 0.004(4) 0.006(5) 
O3 0.0296(11) 0.0453(14) 0.0289(10) 0.0061(10) 0.0041(9) -0.0031(10) 
 
_geom_special_details 
; 
 All esds (except the esd in the dihedral angle between two l.s. planes) 
 are estimated using the full covariance matrix.  The cell esds are taken 
 into account individually in the estimation of esds in distances, angles 
 and torsion angles; correlations between esds in cell parameters are only 
 used when they are defined by crystal symmetry.  An approximate (isotropic) 
 treatment of cell esds is used for estimating esds involving l.s. planes. 
; 
 
loop_ 
 _geom_bond_atom_site_label_1 
 _geom_bond_atom_site_label_2 
 _geom_bond_distance 
 _geom_bond_site_symmetry_2 
 _geom_bond_publ_flag 
Co1 N1 2.104(2) . ? 
Co1 O3 2.135(2) . ? 
Co1 O2 2.1790(17) . ? 
Co1 O1 2.190(2) . ? 
Co1 N4 2.195(2) . ? 
Co1 N5 2.195(2) . ? 
Co1 N3 2.202(2) . ? 
O2 C9 1.254(3) . ? 
O1 C1 1.251(3) . ? 
N3 C2 1.287(3) . ? 
N3 N6 1.350(4) . ? 
N9 C9 1.325(3) . ? 
N7 N5 1.369(3) . ? 
N7 C9 1.373(3) . ? 
N4 C7 1.335(4) . ? 
N4 C3 1.347(4) . ? 
N6 C1 1.379(3) . ? 
N8 C1 1.329(4) . ? 
N5 C8 1.285(3) . ? 
N1 C13 1.147(4) . ? 
N11 C14 1.157(4) . ? 
C13 C12 1.405(4) . ? 
C8 C11 1.480(4) . ? 
C8 C7 1.487(4) . ? 
C15 N10 1.144(5) . ? 
C15 C12 1.413(4) . ? 
C12 C14 1.403(4) . ? 
C3 C4 1.397(4) . ? 
C3 C2 1.477(5) . ? 
C2 C10 1.496(4) . ? 
C7 C6 1.400(4) . ? 
C6 C5 1.381(5) . ? 
C4 C5 1.376(5) . ? 
N2 O6 1.223(4) . ? 
N2 O5 1.242(4) . ? 
N2 O4 1.244(3) . ? 
 
loop_ 
 _geom_angle_atom_site_label_1 
 _geom_angle_atom_site_label_2 
 _geom_angle_atom_site_label_3 
 _geom_angle 
 _geom_angle_site_symmetry_1 
 _geom_angle_site_symmetry_3 
 _geom_angle_publ_flag 
N1 Co1 O3 171.21(9) . . ? 
N1 Co1 O2 87.39(8) . . ? 
O3 Co1 O2 83.84(8) . . ? 
N1 Co1 O1 90.66(9) . . ? 
O3 Co1 O1 86.69(9) . . ? 
O2 Co1 O1 76.23(7) . . ? 
N1 Co1 N4 94.48(8) . . ? 
O3 Co1 N4 92.80(9) . . ? 
O2 Co1 N4 142.02(9) . . ? 
O1 Co1 N4 141.52(8) . . ? 
N1 Co1 N5 92.07(9) . . ? 
O3 Co1 N5 85.75(10) . . ? 
O2 Co1 N5 71.73(7) . . ? 
O1 Co1 N5 147.67(7) . . ? 
N4 Co1 N5 70.29(9) . . ? 
N1 Co1 N3 91.52(9) . . ? 
O3 Co1 N3 95.59(9) . . ? 
O2 Co1 N3 147.85(9) . . ? 
O1 Co1 N3 71.65(8) . . ? 
N4 Co1 N3 70.11(9) . . ? 
N5 Co1 N3 140.40(9) . . ? 
C9 O2 Co1 117.93(16) . . ? 
C1 O1 Co1 117.49(18) . . ? 
C2 N3 N6 121.0(3) . . ? 
C2 N3 Co1 123.1(2) . . ? 
N6 N3 Co1 115.81(17) . . ? 
N5 N7 C9 114.0(2) . . ? 
C7 N4 C3 120.4(2) . . ? 
C7 N4 Co1 119.68(18) . . ? 
C3 N4 Co1 119.8(2) . . ? 
N3 N6 C1 114.8(2) . . ? 
C8 N5 N7 120.7(2) . . ? 
C8 N5 Co1 123.25(19) . . ? 
N7 N5 Co1 116.03(16) . . ? 
C13 N1 Co1 165.5(2) . . ? 
N1 C13 C12 177.4(3) . . ? 
N5 C8 C11 126.1(3) . . ? 
N5 C8 C7 112.1(3) . . ? 
C11 C8 C7 121.8(2) . . ? 
N10 C15 C12 179.1(4) . . ? 
C14 C12 C13 117.8(3) . . ? 
C14 C12 C15 120.7(3) . . ? 
C13 C12 C15 121.0(3) . . ? 
N4 C3 C4 121.1(3) . . ? 
N4 C3 C2 114.3(2) . . ? 
C4 C3 C2 124.6(3) . . ? 
N11 C14 C12 177.6(3) . . ? 
N3 C2 C3 112.5(3) . . ? 
N3 C2 C10 125.4(3) . . ? 
C3 C2 C10 122.1(3) . . ? 
N4 C7 C6 121.4(3) . . ? 
N4 C7 C8 114.7(2) . . ? 
C6 C7 C8 124.0(3) . . ? 
O1 C1 N8 124.6(3) . . ? 
O1 C1 N6 119.7(3) . . ? 
N8 C1 N6 115.6(3) . . ? 
C5 C6 C7 118.1(3) . . ? 
C5 C4 C3 118.3(3) . . ? 
O2 C9 N9 124.1(2) . . ? 
O2 C9 N7 119.8(2) . . ? 
N9 C9 N7 116.1(2) . . ? 
C4 C5 C6 120.8(3) . . ? 
O6 N2 O5 120.3(3) . . ? 
O6 N2 O4 119.9(3) . . ? 
O5 N2 O4 119.8(3) . . ? 
 
_diffrn_measured_fraction_theta_max    0.999 
_diffrn_reflns_theta_full              29.07 
_diffrn_measured_fraction_theta_full   0.999 
_refine_diff_density_max    1.010 
_refine_diff_density_min   -0.782 
_refine_diff_density_rms    0.093 
