# Supplementary material
Source: MDPI journal article supplement (https://www.mdpi.com/2312-7481/5/4/58)
Supplement: s1 [file s1 › Supplementary Files/5.cif]

 
data_5
 
_audit_creation_method            SHELXL-97 
_chemical_name_systematic 
; 
 ? 
; 
_chemical_name_common             ? 
_chemical_melting_point           ? 
_chemical_formula_moiety          
 'C22 H30 Co2 N23 O5, N3, 4(H2 O)' 
_chemical_formula_sum 
 'C22 H38 Co2 N26 O9' 
_chemical_formula_weight          928.64 
 
loop_ 
 _atom_type_symbol 
 _atom_type_description 
 _atom_type_scat_dispersion_real 
 _atom_type_scat_dispersion_imag 
 _atom_type_scat_source 
 'C'  'C'   0.0033   0.0016 
 'International Tables Vol C Tables 4.2.6.8 and 6.1.1.4' 
 'H'  'H'   0.0000   0.0000 
 'International Tables Vol C Tables 4.2.6.8 and 6.1.1.4' 
 'N'  'N'   0.0061   0.0033 
 'International Tables Vol C Tables 4.2.6.8 and 6.1.1.4' 
 'O'  'O'   0.0106   0.0060 
 'International Tables Vol C Tables 4.2.6.8 and 6.1.1.4' 
 'Co'  'Co'   0.3494   0.9721 
 'International Tables Vol C Tables 4.2.6.8 and 6.1.1.4' 
 
_symmetry_cell_setting monoclinic
_symmetry_space_group_name_H-M 'C 2/c' 
 
loop_ 
 _symmetry_equiv_pos_as_xyz 
 'x, y, z' 
 '-x, y, -z+1/2' 
 'x+1/2, y+1/2, z' 
 '-x+1/2, y+1/2, -z+1/2' 
 '-x, -y, -z' 
 'x, -y, z-1/2' 
 '-x+1/2, -y+1/2, -z' 
 'x+1/2, -y+1/2, z-1/2' 
 
_cell_length_a                    22.3521(7) 
_cell_length_b                    13.8512(4) 
_cell_length_c                    13.9977(4) 
_cell_angle_alpha                 90.00 
_cell_angle_beta                  118.433(3) 
_cell_angle_gamma                 90.00 
_cell_volume                      3811.0(2) 
_cell_formula_units_Z             4 
_cell_measurement_temperature   150.0(1) 
_cell_measurement_reflns_used   3018
_cell_measurement_theta_min     2.9353
_cell_measurement_theta_max     29.0072
 
_exptl_crystal_description       'prism' 
_exptl_crystal_colour             'dark red' 
_exptl_crystal_size_max           0.3 
_exptl_crystal_size_mid           0.2 
_exptl_crystal_size_min           0.1 
_exptl_crystal_density_meas       ? 
_exptl_crystal_density_diffrn     1.619 
_exptl_crystal_density_method     'not measured' 
_exptl_crystal_F_000              1912 
_exptl_absorpt_coefficient_mu     0.955 
_exptl_absorpt_correction_T_min                   0.97811
_exptl_absorpt_correction_T_max                   1.00000
_exptl_absorpt_correction_type            'multi-scan'
_exptl_absorpt_process_details
;
CrysAlisPro, Agilent Technologies,
Version 1.171.36.20 (release 27-06-2012 CrysAlis171 .NET)
(compiled Jul 11 2012,15:38:31)
Empirical absorption correction using spherical harmonics,
 implemented in SCALE3 ABSPACK scaling algorithm.
;
_diffrn_ambient_temperature 150.0(1) 
_diffrn_radiation_wavelength 0.7107
_diffrn_radiation_type 'Mo K\a'
_diffrn_radiation_source 'Enhance (Mo) X-ray Source'
_diffrn_radiation_monochromator 'graphite'
_diffrn_measurement_device_type 'Xcalibur, Eos'
_diffrn_detector_area_resol_mean 16.2060
_diffrn_measurement_method '\w scans'
_diffrn_standards_number          ? 
_diffrn_standards_interval_count  ? 
_diffrn_standards_interval_time   ? 
_diffrn_standards_decay_%         ? 
_diffrn_reflns_number             7984 
_diffrn_reflns_av_R_equivalents   0.0256 
_diffrn_reflns_av_sigmaI/netI     0.0434 
_diffrn_reflns_limit_h_min        -16 
_diffrn_reflns_limit_h_max        27 
_diffrn_reflns_limit_k_min        -17 
_diffrn_reflns_limit_k_max        14 
_diffrn_reflns_limit_l_min        -17 
_diffrn_reflns_limit_l_max        16 
_diffrn_reflns_theta_min          2.94 
_diffrn_reflns_theta_max          26.32 
_reflns_number_total              3882 
_reflns_number_gt                 3113 
_reflns_threshold_expression      >2sigma(I) 
 
_computing_data_collection        ? 
_computing_cell_refinement        ? 
_computing_data_reduction         ? 
_computing_structure_solution     'SHELXS-97 (Sheldrick, 1990)' 
_computing_structure_refinement   'SHELXL-97 (Sheldrick, 1997)' 
_computing_molecular_graphics     ? 
_computing_publication_material   ? 
 
_refine_special_details 
; 
 Refinement of F^2^ against ALL reflections.  The weighted R-factor wR and 
 goodness of fit S are based on F^2^, conventional R-factors R are based 
 on F, with F set to zero for negative F^2^. The threshold expression of 
 F^2^ > 2sigma(F^2^) is used only for calculating R-factors(gt) etc. and is 
 not relevant to the choice of reflections for refinement.  R-factors based 
 on F^2^ are statistically about twice as large as those based on F, and R- 
 factors based on ALL data will be even larger. 
; 
 
_refine_ls_structure_factor_coef  Fsqd  
_refine_ls_matrix_type            full 
_refine_ls_weighting_scheme       calc  
_refine_ls_weighting_details 
 'calc w=1/[\s^2^(Fo^2^)+(0.0527P)^2^+3.0946P] where P=(Fo^2^+2Fc^2^)/3' 
_atom_sites_solution_primary      direct 
_atom_sites_solution_secondary    difmap 
_atom_sites_solution_hydrogens    geom 
_refine_ls_hydrogen_treatment     mixed 
_refine_ls_extinction_method      none 
_refine_ls_extinction_coef        ? 
_refine_ls_number_reflns          3882 
_refine_ls_number_parameters      289 
_refine_ls_number_restraints      12 
_refine_ls_R_factor_all           0.0545 
_refine_ls_R_factor_gt            0.0402 
_refine_ls_wR_factor_ref          0.1064 
_refine_ls_wR_factor_gt           0.1005 
_refine_ls_goodness_of_fit_ref    1.064 
_refine_ls_restrained_S_all       1.084 
_refine_ls_shift/su_max           0.001 
_refine_ls_shift/su_mean          0.000 
 
loop_ 
 _atom_site_label 
 _atom_site_type_symbol 
 _atom_site_fract_x 
 _atom_site_fract_y 
 _atom_site_fract_z 
 _atom_site_U_iso_or_equiv 
 _atom_site_adp_type 
 _atom_site_occupancy 
 _atom_site_symmetry_multiplicity 
 _atom_site_calc_flag 
 _atom_site_refinement_flags 
 _atom_site_disorder_assembly 
 _atom_site_disorder_group 
Co1 Co 0.336965(18) -0.17160(3) 0.32835(3) 0.01358(12) Uani 1 1 d . . . 
C5 C 0.44137(15) -0.2504(2) 0.0964(2) 0.0263(7) Uani 1 1 d . A . 
H5A H 0.4606 -0.2653 0.0521 0.032 Uiso 1 1 calc R . . 
C11 C 0.40494(16) 0.0515(2) 0.1634(2) 0.0276(7) Uani 1 1 d . A . 
H11A H 0.4445 0.0397 0.1549 0.041 Uiso 1 1 calc R . . 
H11B H 0.4139 0.1040 0.2132 0.041 Uiso 1 1 calc R . . 
H11C H 0.3672 0.0679 0.0943 0.041 Uiso 1 1 calc R . . 
O1 O 0.29441(10) -0.23892(14) 0.42179(16) 0.0205(4) Uani 1 1 d . A . 
N9 N 0.29059(12) 0.11272(17) 0.39175(18) 0.0214(5) Uani 1 1 d . A . 
H9A H 0.2712 0.1087 0.4320 0.026 Uiso 1 1 calc R . . 
H9B H 0.2972 0.1683 0.3709 0.026 Uiso 1 1 calc R . . 
O2 O 0.30232(10) -0.04978(14) 0.38888(15) 0.0195(4) Uani 1 1 d . A . 
C2 C 0.37259(13) -0.3697(2) 0.2664(2) 0.0165(6) Uani 1 1 d . . . 
N4 N 0.38345(11) -0.20651(18) 0.22641(17) 0.0165(5) Uani 1 1 d . A . 
C10 C 0.37711(15) -0.4756(2) 0.2521(2) 0.0254(7) Uani 1 1 d . A . 
H10A H 0.3574 -0.4903 0.1761 0.038 Uiso 1 1 calc R . . 
H10B H 0.3529 -0.5096 0.2828 0.038 Uiso 1 1 calc R . . 
H10C H 0.4240 -0.4952 0.2882 0.038 Uiso 1 1 calc R . . 
N5 N 0.35936(11) -0.03778(17) 0.26742(17) 0.0167(5) Uani 1 1 d . A . 
N12 N 0.22829(11) -0.13179(17) 0.10724(18) 0.0176(5) Uani 1 1 d . . . 
N8 N 0.28073(13) -0.37614(18) 0.49863(19) 0.0246(6) Uani 1 1 d . . . 
H8A H 0.2628 -0.3457 0.5323 0.030 Uiso 1 1 calc R . . 
H8B H 0.2860 -0.4377 0.5055 0.030 Uiso 1 1 calc R . . 
C9 C 0.31037(14) 0.0327(2) 0.3616(2) 0.0173(6) Uani 1 1 d . . . 
N7 N 0.34056(11) 0.04557(17) 0.29720(18) 0.0181(5) Uani 1 1 d . A . 
H7A H 0.3471 0.1016 0.2773 0.022 Uiso 1 1 calc R . . 
N6 N 0.32711(12) -0.38282(17) 0.38341(18) 0.0186(5) Uani 1 1 d . . . 
H6A H 0.3295 -0.4448 0.3869 0.022 Uiso 1 1 calc R A . 
N3 N 0.34965(11) -0.32898(17) 0.32511(17) 0.0158(5) Uani 1 1 d . A . 
N13 N 0.22079(13) -0.08922(19) 0.03038(19) 0.0270(6) Uani 1 1 d . A . 
N1 N 0.23576(11) -0.17543(17) 0.18524(18) 0.0199(5) Uani 1 1 d . A . 
C8 C 0.38819(13) -0.0370(2) 0.2067(2) 0.0179(6) Uani 1 1 d . . . 
C4 C 0.42215(14) -0.3240(2) 0.1433(2) 0.0233(7) Uani 1 1 d . . . 
H4A H 0.4283 -0.3884 0.1311 0.028 Uiso 1 1 calc R A . 
C7 C 0.40210(13) -0.1352(2) 0.1811(2) 0.0180(6) Uani 1 1 d . A . 
C3 C 0.39356(13) -0.2991(2) 0.2087(2) 0.0182(6) Uani 1 1 d . A . 
C1 C 0.30021(14) -0.3282(2) 0.4362(2) 0.0176(6) Uani 1 1 d . A . 
C6 C 0.43208(14) -0.1549(2) 0.1154(2) 0.0231(7) Uani 1 1 d . . . 
H6B H 0.4455 -0.1050 0.0852 0.028 Uiso 1 1 calc R A . 
O3 O 0.43598(11) -0.16423(16) 0.47039(16) 0.0205(5) Uani 0.50 1 d P A 1 
N2 N 0.43598(11) -0.16423(16) 0.47039(16) 0.0205(5) Uani 0.50 1 d P A 2 
N11 N 0.4995(8) -0.0175(6) 0.5115(11) 0.0273(19) Uani 0.50 1 d P . 2 
N10 N 0.4667(2) -0.0900(4) 0.4909(3) 0.0158(10) Uani 0.50 1 d P . 2 
N14 N 0.5000 -0.5000 0.5000 0.0488(12) Uani 1 2 d S . . 
N15 N 0.54173(16) -0.5212(3) 0.4693(2) 0.0498(9) Uani 1 1 d . . . 
O1W O 0.63337(13) -0.23853(17) 0.7276(2) 0.0440(7) Uani 1 1 d DU . . 
H1 H 0.6645(13) -0.274(2) 0.721(3) 0.053 Uiso 1 1 d D . . 
H2 H 0.5924(9) -0.259(3) 0.691(3) 0.053 Uiso 1 1 d D . . 
O2W O 0.49581(13) -0.2977(2) 0.6456(2) 0.0454(6) Uani 1 1 d D . . 
H3 H 0.4840(18) -0.3613(17) 0.607(3) 0.055 Uiso 1 1 d D . . 
H4 H 0.4527(13) -0.289(3) 0.647(3) 0.055 Uiso 1 1 d D . . 
 
loop_ 
 _atom_site_aniso_label 
 _atom_site_aniso_U_11 
 _atom_site_aniso_U_22 
 _atom_site_aniso_U_33 
 _atom_site_aniso_U_23 
 _atom_site_aniso_U_13 
 _atom_site_aniso_U_12 
Co1 0.01471(19) 0.0133(2) 0.0151(2) 0.00074(15) 0.00905(15) -0.00047(16) 
C5 0.0191(14) 0.044(2) 0.0187(14) -0.0045(14) 0.0114(12) -0.0005(15) 
C11 0.0322(17) 0.0284(17) 0.0292(16) 0.0047(14) 0.0201(14) -0.0043(15) 
O1 0.0261(11) 0.0147(10) 0.0286(11) 0.0053(8) 0.0194(9) 0.0020(9) 
N9 0.0254(13) 0.0164(12) 0.0245(12) -0.0003(10) 0.0134(11) -0.0001(11) 
O2 0.0269(11) 0.0153(10) 0.0226(10) 0.0016(8) 0.0169(9) 0.0017(9) 
C2 0.0099(12) 0.0218(15) 0.0135(12) -0.0032(11) 0.0020(11) 0.0006(12) 
N4 0.0131(11) 0.0216(12) 0.0148(11) -0.0006(9) 0.0067(9) -0.0022(10) 
C10 0.0272(16) 0.0213(16) 0.0259(15) -0.0050(13) 0.0114(13) 0.0042(14) 
N5 0.0167(11) 0.0173(12) 0.0156(11) -0.0001(9) 0.0072(10) -0.0026(10) 
N12 0.0156(11) 0.0139(12) 0.0216(12) -0.0044(10) 0.0075(10) -0.0024(10) 
N8 0.0374(15) 0.0165(13) 0.0316(14) 0.0052(11) 0.0259(12) 0.0033(12) 
C9 0.0157(13) 0.0172(15) 0.0147(13) 0.0002(11) 0.0038(11) -0.0007(12) 
N7 0.0219(12) 0.0122(12) 0.0222(12) 0.0027(10) 0.0122(10) -0.0008(10) 
N6 0.0250(12) 0.0119(12) 0.0233(12) 0.0023(10) 0.0150(11) -0.0005(11) 
N3 0.0155(11) 0.0165(12) 0.0141(11) 0.0008(9) 0.0059(9) -0.0008(10) 
N13 0.0301(14) 0.0253(14) 0.0208(12) 0.0035(11) 0.0082(11) -0.0043(12) 
N1 0.0169(11) 0.0206(13) 0.0211(12) 0.0015(10) 0.0080(10) -0.0030(11) 
C8 0.0126(12) 0.0252(16) 0.0135(13) 0.0018(12) 0.0041(11) -0.0040(12) 
C4 0.0162(13) 0.0331(18) 0.0195(14) -0.0066(13) 0.0075(12) 0.0017(14) 
C7 0.0114(13) 0.0280(16) 0.0130(13) 0.0008(12) 0.0045(11) -0.0024(12) 
C3 0.0123(12) 0.0252(15) 0.0147(13) -0.0055(12) 0.0045(11) -0.0015(12) 
C1 0.0162(13) 0.0185(14) 0.0175(13) 0.0016(12) 0.0074(11) -0.0012(13) 
C6 0.0169(13) 0.0364(19) 0.0180(14) 0.0008(13) 0.0099(12) -0.0043(14) 
O3 0.0178(10) 0.0220(12) 0.0183(11) -0.0007(9) 0.0058(9) -0.0029(10) 
N2 0.0178(10) 0.0220(12) 0.0183(11) -0.0007(9) 0.0058(9) -0.0029(10) 
N11 0.030(2) 0.022(7) 0.029(6) -0.002(4) 0.013(3) -0.001(6) 
N10 0.014(2) 0.023(3) 0.013(2) 0.000(2) 0.0083(18) 0.007(2) 
N14 0.049(3) 0.058(3) 0.033(2) 0.011(2) 0.014(2) 0.013(3) 
N15 0.0416(18) 0.061(2) 0.0435(18) 0.0195(17) 0.0177(16) 0.0161(18) 
O1W 0.0358(13) 0.0232(13) 0.087(2) -0.0030(12) 0.0404(14) -0.0017(11) 
O2W 0.0426(15) 0.0476(16) 0.0437(15) 0.0059(13) 0.0186(13) 0.0020(14) 
 
_geom_special_details 
; 
 All esds (except the esd in the dihedral angle between two l.s. planes) 
 are estimated using the full covariance matrix.  The cell esds are taken 
 into account individually in the estimation of esds in distances, angles 
 and torsion angles; correlations between esds in cell parameters are only 
 used when they are defined by crystal symmetry.  An approximate (isotropic) 
 treatment of cell esds is used for estimating esds involving l.s. planes. 
; 
 
loop_ 
 _geom_bond_atom_site_label_1 
 _geom_bond_atom_site_label_2 
 _geom_bond_distance 
 _geom_bond_site_symmetry_2 
 _geom_bond_publ_flag 
Co1 O1 2.1610(19) . ? 
Co1 O3 2.161(2) . ? 
Co1 N4 2.182(2) . ? 
Co1 O2 2.1885(19) . ? 
Co1 N1 2.195(2) . ? 
Co1 N5 2.196(2) . ? 
Co1 N3 2.202(2) . ? 
C5 C6 1.385(4) . ? 
C5 C4 1.386(4) . ? 
C5 H5A 0.9300 . ? 
C11 C8 1.492(4) . ? 
C11 H11A 0.9600 . ? 
C11 H11B 0.9600 . ? 
C11 H11C 0.9600 . ? 
O1 C1 1.249(3) . ? 
N9 C9 1.335(4) . ? 
N9 H9A 0.8600 . ? 
N9 H9B 0.8600 . ? 
O2 C9 1.244(3) . ? 
C2 N3 1.287(3) . ? 
C2 C3 1.480(4) . ? 
C2 C10 1.491(4) . ? 
N4 C7 1.343(4) . ? 
N4 C3 1.345(4) . ? 
C10 H10A 0.9600 . ? 
C10 H10B 0.9600 . ? 
C10 H10C 0.9600 . ? 
N5 C8 1.289(3) . ? 
N5 N7 1.360(3) . ? 
N12 N13 1.167(3) . ? 
N12 N1 1.188(3) . ? 
N8 C1 1.325(3) . ? 
N8 H8A 0.8600 . ? 
N8 H8B 0.8600 . ? 
C9 N7 1.370(3) . ? 
N7 H7A 0.8600 . ? 
N6 N3 1.367(3) . ? 
N6 C1 1.380(3) . ? 
N6 H6A 0.8600 . ? 
C8 C7 1.477(4) . ? 
C4 C3 1.387(4) . ? 
C4 H4A 0.9300 . ? 
C7 C6 1.398(4) . ? 
C6 H6B 0.9300 . ? 
N11 N11 0.590(11) 5_656 ? 
N11 N10 1.195(13) . ? 
N11 N10 1.679(9) 5_656 ? 
N10 N11 1.679(9) 5_656 ? 
N14 N15 1.234(3) 5_646 ? 
N14 N15 1.234(3) . ? 
O1W H1 0.891(18) . ? 
O1W H2 0.856(18) . ? 
O2W H3 1.003(18) . ? 
O2W H4 0.981(18) . ? 
 
loop_ 
 _geom_angle_atom_site_label_1 
 _geom_angle_atom_site_label_2 
 _geom_angle_atom_site_label_3 
 _geom_angle 
 _geom_angle_site_symmetry_1 
 _geom_angle_site_symmetry_3 
 _geom_angle_publ_flag 
O1 Co1 O3 90.95(8) . . ? 
O1 Co1 N4 141.63(8) . . ? 
O3 Co1 N4 90.82(8) . . ? 
O1 Co1 O2 76.08(7) . . ? 
O3 Co1 O2 90.20(8) . . ? 
N4 Co1 O2 142.23(8) . . ? 
O1 Co1 N1 89.00(8) . . ? 
O3 Co1 N1 178.51(9) . . ? 
N4 Co1 N1 90.15(8) . . ? 
O2 Co1 N1 88.34(8) . . ? 
O1 Co1 N5 147.88(8) . . ? 
O3 Co1 N5 89.68(8) . . ? 
N4 Co1 N5 70.46(9) . . ? 
O2 Co1 N5 71.80(8) . . ? 
N1 Co1 N5 89.57(8) . . ? 
O1 Co1 N3 71.54(8) . . ? 
O3 Co1 N3 88.86(8) . . ? 
N4 Co1 N3 70.18(9) . . ? 
O2 Co1 N3 147.59(8) . . ? 
N1 Co1 N3 92.53(8) . . ? 
N5 Co1 N3 140.58(8) . . ? 
C6 C5 C4 120.2(3) . . ? 
C6 C5 H5A 119.9 . . ? 
C4 C5 H5A 119.9 . . ? 
C8 C11 H11A 109.5 . . ? 
C8 C11 H11B 109.5 . . ? 
H11A C11 H11B 109.5 . . ? 
C8 C11 H11C 109.5 . . ? 
H11A C11 H11C 109.5 . . ? 
H11B C11 H11C 109.5 . . ? 
C1 O1 Co1 118.89(18) . . ? 
C9 N9 H9A 120.0 . . ? 
C9 N9 H9B 120.0 . . ? 
H9A N9 H9B 120.0 . . ? 
C9 O2 Co1 117.32(17) . . ? 
N3 C2 C3 112.6(3) . . ? 
N3 C2 C10 126.2(3) . . ? 
C3 C2 C10 121.2(2) . . ? 
C7 N4 C3 119.8(2) . . ? 
C7 N4 Co1 119.84(19) . . ? 
C3 N4 Co1 120.36(18) . . ? 
C2 C10 H10A 109.5 . . ? 
C2 C10 H10B 109.5 . . ? 
H10A C10 H10B 109.5 . . ? 
C2 C10 H10C 109.5 . . ? 
H10A C10 H10C 109.5 . . ? 
H10B C10 H10C 109.5 . . ? 
C8 N5 N7 121.3(2) . . ? 
C8 N5 Co1 122.8(2) . . ? 
N7 N5 Co1 115.89(16) . . ? 
N13 N12 N1 179.7(4) . . ? 
C1 N8 H8A 120.0 . . ? 
C1 N8 H8B 120.0 . . ? 
H8A N8 H8B 120.0 . . ? 
O2 C9 N9 123.2(3) . . ? 
O2 C9 N7 120.7(2) . . ? 
N9 C9 N7 116.1(2) . . ? 
N5 N7 C9 114.3(2) . . ? 
N5 N7 H7A 122.9 . . ? 
C9 N7 H7A 122.9 . . ? 
N3 N6 C1 113.5(2) . . ? 
N3 N6 H6A 123.2 . . ? 
C1 N6 H6A 123.2 . . ? 
C2 N3 N6 120.9(2) . . ? 
C2 N3 Co1 122.78(19) . . ? 
N6 N3 Co1 116.13(17) . . ? 
N12 N1 Co1 117.33(18) . . ? 
N5 C8 C7 112.4(2) . . ? 
N5 C8 C11 125.2(3) . . ? 
C7 C8 C11 122.4(2) . . ? 
C5 C4 C3 118.3(3) . . ? 
C5 C4 H4A 120.9 . . ? 
C3 C4 H4A 120.9 . . ? 
N4 C7 C6 121.4(3) . . ? 
N4 C7 C8 114.5(2) . . ? 
C6 C7 C8 124.1(3) . . ? 
N4 C3 C4 121.9(3) . . ? 
N4 C3 C2 113.9(2) . . ? 
C4 C3 C2 124.1(3) . . ? 
O1 C1 N8 124.2(3) . . ? 
O1 C1 N6 119.6(2) . . ? 
N8 C1 N6 116.2(3) . . ? 
C5 C6 C7 118.3(3) . . ? 
C5 C6 H6B 120.8 . . ? 
C7 C6 H6B 120.8 . . ? 
N11 N11 N10 138(4) 5_656 . ? 
N11 N11 N10 29(3) 5_656 5_656 ? 
N10 N11 N10 166.3(10) . 5_656 ? 
N11 N10 N11 13.7(10) . 5_656 ? 
N15 N14 N15 180.0(3) 5_646 . ? 
H1 O1W H2 115(3) . . ? 
H3 O2W H4 96(2) . . ? 
 
_diffrn_measured_fraction_theta_max    0.999 
_diffrn_reflns_theta_full              26.32 
_diffrn_measured_fraction_theta_full   0.999 
_refine_diff_density_max    0.886 
_refine_diff_density_min   -0.604 
_refine_diff_density_rms    0.080 
